1 **Genome scan identifies flowering-independent effects of barley HsDry2.2 locus**  
2 **on yield traits under water deficit**

3

4

5 Lianne Merchuk-Ovnat<sup>\*1,2</sup>, Roi Silberman<sup>\*1</sup>, Efrat Laiba<sup>1</sup>, Andreas Maurer<sup>3</sup>, Klaus  
6 Pillen<sup>3</sup>, Adi Faigenboim<sup>1</sup>, Eyal Fridman<sup>1</sup>

7

8 <sup>1</sup> Institute of Plant Sciences, Agricultural Research Organization (ARO), The Volcani  
9 Center, P. O. Box 6, 5025001, Bet Dagan, Israel

10 <sup>2</sup> The Smith Institute of Plant Sciences and Genetics in Agriculture, The Hebrew  
11 University of Jerusalem, Rehovot 76100 Israel

12 <sup>3</sup> Institute of Agricultural and Nutritional Sciences, Martin-Luther University Halle-  
13 Wittenberg, Halle (Saale), Germany

14

15 \* These authors equally contributed to this manuscript.

16

17 Author for correspondence:

18 Eyal Fridman

19 Institute of Plant Sciences, Agricultural Research Organization (ARO), The Volcani

20 Center, P. O. Box 6, 5025001, Bet Dagan, Israel E-mail: [fridmane@agri.gov.il](mailto:fridmane@agri.gov.il), Tel:

21 +972-3-9683901

22

23

24

25

26

27

28 **Highlight**

29 A flowering-time independent reproductive advantage of wild over cultivated allele  
30 under drought identified in a barley GWAS for genotype-by-environment  
31 interactions, with modified shoot morphology, reduced senescence and longer grain  
32 filling

33

34 **Abstract**

35 Increasing crop productivity under climate change requires the identification,  
36 selection and utilization of novel alleles for breeding. We analyzed the genotype and  
37 field phenotype of the barley HEB-25 multi-parent mapping population under well-  
38 watered and water-limited (WW and WL) environments for two years. A genome-  
39 wide association study (GWAS) for genotype by-environment interactions was  
40 performed for ten traits including flowering time (HEA), plant grain yield (PGY).  
41 Comparison of the GWAS for traits per-se to that for QTL-by-environment  
42 interactions (QxE), indicates the prevalence of QxE mostly for reproductive traits.  
43 One QxE locus on chromosome 2, *Hordeum spontaneum* Dry2.2 (HsDry2.2), showed  
44 a positive and conditional effect on PGY and grain number (GN). The wild allele  
45 significantly reduced HEA, however this earliness was not conditioned by water  
46 deficit. Furthermore, BC<sub>2</sub>F<sub>1</sub> lines segregating for the HsDry2.2 showed the wild allele  
47 confers an advantage over the cultivated in PGY, GN and harvest index as well as  
48 modified shoot morphology, longer grain filling period and reduced senescence (only  
49 under drought), therefore suggesting adaptation mechanism against water deficit other  
50 than escape. This study highlights the value of evaluating wild relatives in search of  
51 novel alleles and clues to resilience mechanism underlying crop adaptation to abiotic  
52 stress.

53

54

55

56

57

58

59

60

61

62 Key words: Adaptation, Drought, Flowering, Genotype by environment interactions,  
63 Grain yield Wild barley

64

65 **Introduction**

66 Barley (*Hordeum vulgare ssp. vulgare* L.) is ranked the fourth most-produced cereal  
67 worldwide, providing fodder, human food and substrate for malting (Druka et al.,  
68 2011). Changing climate and increasing aridity poses a threat to future global food  
69 security (Wheeler et al., 2013), with drought stress, the major factor limiting crop  
70 yield (Boyer, 1982; Araus et al., 2008), expected to further increase (Wheeler and von  
71 Braun, 2013). It is therefore necessary to invest efforts in breeding-based  
72 improvements of crop resilience to abiotic stresses and in enhancement of plant yield  
73 robustness across a range of environments (Cattivelli et al., 2008; Tester and  
74 Langridge, 2010). Domestication of barley, approximately 10,500 years ago (Mascher  
75 et al., 2016), and its subsequent genetic selection, led to gene erosion (Tanksley and  
76 Nelson, 1996). Wild relatives of crops, which harbor most of the predomestication  
77 gene pool, may serve as valuable sources in attempts to formulate new genetic  
78 variation to improve drought resistance in modern varieties (Ellis et al., 2000; Zamir,  
79 2001).

80 Traits enabling drought tolerance may involve adaptive phenological and  
81 cellular processes responsive to water stress. This includes 'escape mechanism', by an  
82 extremely early flowering at the expense of shorten growth cycle; 'drought avoidance'  
83 in which active accumulation of solutes (which reduces osmotic potential to a more  
84 negative value) retain water in the cells (i.e., osmotic adjustment) and sustain  
85 metabolic activity (Blum, 2005). Plant survival only requires conserved water status  
86 and that is usually accompanied by growth inhibition. However, yield stability also  
87 requires the maintenance or increase in sink activity in the reproductive structures,  
88 which contributes to the transport of assimilates from the source leaves and to delayed  
89 stress-induced leaf senescence (Albacete et al., 2014). An ample number of genes  
90 have been suggested to be involved in drought tolerance, yet many were discovered  
91 using differential genomics methods (Bedada et al., 2014; Rollins et al., 2013). That  
92 ignore a whole-plant perspective, which is to key to understanding the subtle sink-  
93 source relationship and its optimal maintenance for yield stability. Genome scans in  
94 search of reproducible quantitative trait loci (QTL) by-environment interaction (QxE)  
95 loci under field set-ups, which takes into account possible pleiotropic effects, or lack  
96 thereof, provide a promising entry point for deciphering major drivers of pathways  
97 that confer field drought tolerance.

98           Advanced backcross QTL analysis (AB-QTL) (Tanksley and Nelson, 1996)  
99   enables the introduction of beneficial alleles into the modern gene pool, by crossing a  
100   wild donor accession with a modern elite cultivar (Fulton et al., 2000; Pillen et al.,  
101   2003; Talamè et al., 2004; Von Korff et al., 2005; Von Korff et al., 2006; Von Korff  
102   et al., 2008; von Korff et al., 2010), followed by a number of selfings. Also,  
103   recombinant inbred line (RIL) populations, derived from crossings of a wild donor  
104   with a cultivar (or between two distinct domesticated parental lines), have been used  
105   to map QTLs for grain yield and yield components under reduced moisture (Teulat et  
106   al., 2003; Kirigwi et al., 2007). In contrast to the limited allelic diversity in such bi-  
107   parental-based genetic structures (Comadran et al., 2011), the recently developed  
108   multiparental population, that combines linkage and genome-wide association (GWA)  
109   approaches, offers a much wider genetic variance. GWA studies (GWAS) have  
110   seldom been used to detect QxE interactions, mainly due to lack of statistical power,  
111   owing to the frequent occurrence of rare alleles that are difficult to detect in a GWAS,  
112   but which appear to contribute to strong genotype by-environment interactions  
113   (Thomas, 2010). Notably, in most of these studies, the genetic model undertaken  
114   compares the GWAS results under one versus another environment to identify  
115   environment-specific QTLs. Very few studies have considered marker-by-  
116   environment interactions in their genetic model, and thereby preclude testing of same  
117   SNPs across all environments and reduce the ability to discover novel alleles or genes  
118   that synergistically contribute to environmental adaptation and plasticity (El-Soda et  
119   al., 2014). From a breeding point of view, constitutive QTL are the main targets for  
120   breeding programs, as they show a consistent effect across environments (Comadran  
121   et al., 2011; Korte et al., 2012). However, if the goal is to understand the mechanism  
122   underlying GxE interactions, then conditioned QTL are imperative targets for follow-  
123   up studies.

124           The barley nested association mapping (NAM) population, termed 'Halle  
125   Exotic Barley 25' (HEB-25), originated from interspecific crosses between the spring  
126   barley elite cultivar Barke (*Hordeum vulgare* ssp. *vulgare*, Hv) and 25 highly  
127   divergent exotic *H. spontaneum* (Hs) wild barley. The population was used to study  
128   the genetic architecture of flowering (Maurer et al., 2015) and grain weight (Maurer et  
129   al., 2016). The NAM approach (Buckler et al., 2009) was originally designed to  
130   overcome GWAS limitations, such as the incidence of false positives resulting from  
131   population structure. In this study, NAM was harnessed to evaluate marker by-

132 environment interactions. Each of the 1420 HEB-25 BC<sub>1</sub>S<sub>3</sub> lines and their  
133 corresponding parents were genotyped using the Infinium iSelect 9K chip, which  
134 consists of 7864 SNPs (Comadran et al., 2012). Previously, the combined linkage and  
135 GWAS analysis of HEB-25 identified eight major QTL that control flowering time,  
136 potentially explaining the QTL effect. Most co-located with major flowering genes,  
137 including *Ppd-H1*, *HvCEN* (2H) and *Vrn-H1/H2/H3* (on chromosome 5H, 4H and  
138 7H, respectively). The strongest exotic haplotype identified accelerated flowering  
139 time by 11 days, as compared to Barke (Maurer et al., 2015). Similarly, Maurer et al.  
140 (2016) reported that grain weight was increased by 4.5g and flowering time was  
141 reduced by 9.3 days after substituting Barke elite QTL alleles for exotic QTL alleles  
142 at the semi-dwarf locus *denso/sdw1* (3H) and the *Ppd-H1* loci, respectively. In a more  
143 recent use of this genetic resource, the plants were placed under two regimes of  
144 salinity and the GWA of the two treatments was compared (Saade et al. 2016). While  
145 marker by-environment interactions were not reported, constitutive QTL under both  
146 environments, which, from a breeding point of view is of high value, were identified.

147 In the current study, the BC<sub>1</sub>S<sub>3</sub> HEB-25 families were used in a GWAS of the  
148 genetic architecture of drought response, as defined by plant grain yield and related  
149 traits. A mixed linear model tested the QxE for the studied traits in order to identify  
150 specific loci that contribute to plant adaptation via dependent or independent effects  
151 on phenology and morphology. The analysis showed no interactions between  
152 flowering time loci and identified several significant interactive QTL that affect plant  
153 grain yield and number in a water deficiency dependent manner. Furthermore, a pot  
154 experiment was carried out using an advanced backcross population segregating for  
155 the *HsDry2.2* locus which was found to improve yield when donated by the wild  
156 parent at this locus. This experiment was designed to evaluate the effect of an early  
157 and late water limitation, by measuring plant productivity, phenology, canopy  
158 structure and leaf dimensions. This study highlighted the power of integrating semi-  
159 controlled field experimental systems and inter-specific multi-parental populations in  
160 pursuit of agricultural traits, which may shed light on hitherto unknown mechanisms  
161 underlying crop adaptation.

162

163

164

165

166 **Materials and methods**

167 *Plant Material*

168 *Field trials*; The NAM population HEB-25, which was developed by Maurer *et al.*  
169 (2015), consisted of 1,420 BC<sub>1</sub>S<sub>4</sub> lines belonging to 25 interspecific crosses between  
170 cv Barke and wild barley accessions. All 1,420 BC<sub>1</sub>S<sub>3</sub> lines (one generation earlier)  
171 and their corresponding parents were genotyped using the barley Infinium iSelect 9K  
172 chip (Maurer *et al.*, 2015), consisting of 7864 SNPs (Comadran *et al.*, 2012).  
173 Inclusion of SNPs that were polymorphic in at least one HEB family and that met the  
174 predefined quality criteria (<10% missing, and not in complete linkage disequilibrium  
175 (LD) to another SNP in the set) resulted with 5709 informative loci.

176 *Pot experiment*: BC<sub>2</sub>F<sub>1</sub> seeds (HEB-04-96) segregating for the wild donor allele in the  
177 HsDry2.2 locus were genotyped for the peak marker BOPA2\_12\_30265 using high  
178 resolution melting analysis. This marker was formerly found to show strong divergent  
179 selection in winter *vs.* spring barleys according to Comerdan *et al.*, (2012). SYTO™ 9  
180 Green Fluorescent Nucleic Acid Stain (ThermoFischer, 0.6µl per 20µ reaction) was  
181 used for PCR along with Taq ready mix (HyLabs), with the primers listed in Table  
182 S1. Melting analysis was conducted using RotorGene 6000 real-time PCR machine  
183 and software (Fig. S1A.) and was validated by sequencing (Fig. S1B). Barke  
184 cultivar, which sets the genetic background was also included and genotyped as  
185 control. The different genotypes were grouped as carriers for the wild (Hs/Hs and  
186 Hv/Hs; N=22 and 7, respectively) or cultivated (26 Hv/Hv; N=26) allele for statistical  
187 analyses.

188

189 *Field trials growth Conditions*

190 The HEB-25 lines were evaluated for their drought responses under well-watered  
191 (WW) and water-limited (WL) conditions during the winters of 2014–15 (BC<sub>1</sub>S<sub>3;4</sub>)  
192 and 2015–16 (BC<sub>1</sub>S<sub>3;5</sub>). During 2014-15 the entire population was phenotyped in the  
193 field under both conditions, and in 2015-16 1320 lines were included in the  
194 experiment. Sixteen (2 groups of 8) plants from each line were randomly arranged in  
195 an insect-proof screen house, roofed by polyethylene, at the experimental farm of The  
196 Hebrew University of Jerusalem in Rehovot, Israel (E34°47', N31°54'; 54m above sea  
197 level). Plants were grown within paired troughs (Mapal Horticulture Trough System,  
198 Merom Golan, Israel) that allowed regulation of watering throughout growth (Fig. 1A  
199 and 1B). The unique arrangement of the nethouse enables examining app. 3000

200 experimental units of 8 plants, with capacity to split irrigation between adjacent  
201 troughs. Three cultivated barley lines (Apex, Barke and Bowman) served as control  
202 for the effects of the water deficit. The soil in the troughs was composed of two layers  
203 of volcanic soil (4-20 topped by Odem193 (Toof Merom Golan, Merom Golan,  
204 Israel)). The size of mini-plots, each containing eight plants, was 0.4 x 0.3 meter  
205 (Fig. S2A). To mimic the natural pattern of rainfall in the east Mediterranean region,  
206 water was applied during the winter months starting from planting (Dec. 14 2014 and  
207 Nov. 23 2015, respectively) and ending in early spring (143 and 145 days after  
208 planting, respectively) (Fig. S2B). In order to ensure adequate drought stress,  
209 irrigation was adjusted in accordance with the stomatal conductance determined in  
210 eight test plants per irrigation treatment during the growing season (57, 98, 110, 127  
211 days from planting in 2014-15, and 70, 84, 119, 154 days from planting in 2015-16),  
212 measured using a porometer (Decagon SC-1) (Fig. S2C). This assured a ~30%  
213 differences between the WL and the WW plants, with maximal conductance of 350  
214 and 250  $\text{mmol m}^{-2}\text{s}^{-1}$  in the WL and WW treatments, respectively. The total seasonal  
215 water application included 25 $\text{m}^3$  and 34 $\text{m}^3$  for the WW treatment, and 13 $\text{m}^3$  and 26 $\text{m}^3$   
216 for the WL treatment, in 2014-15 and 2015-16, respectively. NPK fertilizer (Shefer  
217 538 + Microelements, Deshen Gat, Qiryat Gat) was applied via irrigation in 2014-15  
218 (8.1 and 6.5 liter for the WW and the WL treatments, respectively) as well as in 2015-  
219 16 (15.4 for both treatments).

220

#### 221 *Pot experiment irrigation management*

222 Seeds were placed in moist germination paper for a week in a dark cold room (4°C),  
223 followed by a three days of acclimation at room temperature (22°C), then planted into  
224 small plastic pots (60g soil and 300g water, 100% field capacity) in a standard  
225 commercial soil mix (Green 90, Even Ari, Israel) (Fig. S2D). At 28 days after  
226 planting (DAP) plants were transplanted into medium pots (190g soil and 1170g  
227 water). Finally at 52 DAP plants were into large pots (460g soil and 2500g water),  
228 with the initiation of the late drought treatment, 13 days before booting (Fig. S2E).  
229 Pots were weighed manually before and after irrigation, keeping the well -watered  
230 (WW) pots between around 60-90% of field capacity and the water limited pots (WL)  
231 40-60%. Temperatures were monitored using a data logger (Hobo Onset, Bourne, MA  
232 USA).

233



234 *Phenotypic measurements*

235 *Field trials:* Heading time (HEA), defined as the time between sowing to time at  
236 which the first spike of 50% of the plants in a plot reaches BBCH49 (first awns  
237 visible), was recorded based on daily inspection. Days from sowing to stage BBCH87  
238 (hard dough: grain content solid: fingernail impression held) was recorded as maturity  
239 (MAT). At maturity, plant height (HEI) was measured from the soil surface to the  
240 base of the three first spikes per plot.

241 At full grain maturity and after plants were fully dried, all aboveground biomass was  
242 harvested and weighed to determine total dry matter (TDM). Notably, all the free-  
243 thrashing material (app. ¼ of the material) was caged between BBCH49 and BBCH87  
244 to avoid loss of spikes. Spikes were then threshed and weighed to determine plant  
245 grain yield (PGY). Finally, grains were counted to estimate grain number per mini-  
246 plot (GN) and average grain weight (GW). Harvest index (HI) was calculated as the  
247 ratio between PGY and TDM. Vegetative dry matter (VDW) was calculated by  
248 subtracting PGY from TDM. The grain-filling period (GFP) was calculated by  
249 subtracting HEA from MAT. Trait values were adjusted based on the ratio between  
250 population mean values in the two years. The adjusted HEB means across years were  
251 used in the GWAS.

252 *Pot experiment:* Booting time, defined as the date at which the three spikes awns are  
253 first visible in a pot (spikes are tagged), was daily recorded and used to score HEA.  
254 MAT was recorded when the three first (tagged) spikes dried, which was right  
255 followed by the rest of the plant drying out. GFP was calculated by subtracting HEA  
256 from MAT. All aboveground biomass per pot was harvested at full grain maturity;  
257 fertile spikes were counted to assess the number of spikes per plant, separated from  
258 the vegetative organs (stems and leaves), and both were oven-dried (80°C or 38°C for  
259 48 h for vegetative organs and spikes, respectively) and weighed to determine spike  
260 dry matter and TDM. Spikes were threshed and total grain weight was determined.  
261 Plant grain yield (PGY), harvest index (HI = PGY/TDM), grain number per pot (GN)  
262 and averaged grain weight (GW) for the three first headed spikes (tagged) and the rest  
263 of the spikes were calculated separately. At 64 DAP, FL sheath and ‘minus one’ blade  
264 length and blade width were scored. Stem diameter (adjacent to the spike) was scored  
265 after harvest. For the analyses of leaf senescence we used two sets of photos took  
266 using Canon EOS1200 camera at 66 and 78DAP in the background of standard white  
267 sheet (80x120 cm). A custom-made software (unpublished) was used to calculate the

268 ratio of the yellow-brown shades out of the total leaf area. Shades that cover the range  
269 of green or yellow brown were selected by sampling from several images, and were  
270 then used for all analyses. For each photo, the green area and the yellow-brown area  
271 were calculated in percentages, using the YCbCr method, with same tolerance level  
272 for all analyses, while taking into account only the white background. Then, the  
273 percentage of yellow-brown out of total leaf (yellow brown+green) area was  
274 calculated. Senescence was calculated as the delta of yellow-brown/total between  
275 dates (78-66 DAP) for each pot .

276

277

278 *Field trials genome-wide association study (GWAS)*

279 A genome-wide association study was conducted to identify trait variations, per-se,  
280 under WW and WL conditions, and to assess SNP interactions with the environment  
281 (conditional effects), using the GWAF package ([http://cran.r-](http://cran.r-project.org/web/packages/GWAF/)  
282 [project.org/web/packages/GWAF/](http://cran.r-project.org/web/packages/GWAF/)). To test association between each of the  
283 continuous traits and each SNP, we applied the linear mixed effects model (LME)  
284 implemented in `lmekin` function in `kinship` package ([http://cran.r-](http://cran.r-project.org/web/packages/kinship/)  
285 [project.org/web/packages/kinship/](http://cran.r-project.org/web/packages/kinship/)). The analysis was conducted with the adjusted  
286 means following a linear mixed model as follows:

$$Y_{ij} = \mu + F_i + G_j + K + \epsilon_{ij}$$

287 where,  $\mu$  denote the population mean for the trait,  $F_i$  is the family effect ( $i=1..25$ ),  $G_j$   
288 denotes the marker effect (including heterozygous, i.e.  $j=1..3$ ),  $K$  represents the  
289 relative kinship matrix, and  $\epsilon_{ij}$  denotes the error.

290 A genome scan for SNP x environment (QxE) interaction was conducted with the  
291 GWAF package, using the same LME model, but with addition of the WW/WL  
292 condition as follows:

$$Y_{ijk} = \mu + F_i + G_j + E_k + G_j \times E_k + K + \epsilon_{ijk}$$

293

294 where,  $E_k$  denotes the watering (environment) effect,  $G_j \times E_k$  denotes the effect of the  
295 interaction between the marker and the environment,  $K$  represents the relative kinship  
296 matrix, and  $\epsilon_{ijk}$  denotes the error.

297 To test the robustness of the association for each SNP, the procedure was cross  
298 validated 200 times on random sub-samples of the full dataset. Each subsample

299 included 70% of the lines, randomly selected per HEB family. Markers that were  
300 significantly detected ( $P < 0.05$ ) in at least 30% of sub-samples were accepted as  
301 putative QTLs. The designation of the QTL was based on LD with the major SNP that  
302 showed the maximal significance level in a genomic interval (Maurer et al. 2015).

303

304 *Pot experiment statistics*

305 A factorial model (3 irrigation treatments x 2 allelic states) was employed for the  
306 analysis of variance (ANOVA), with irrigation treatment and allelic state as fixed  
307 effects. Each experimental unit consisted of a pot with one plant. The JMP version  
308 12.0 statistical package (SAS Institute, Cary, NC, USA) was used for statistical  
309 analyses.

310

311

312

313

314 **Results**

315 *Whole-plant phenotype of the HEB-25 multi-parent population under well-watered*  
316 *(WW) and water-limited (WL) conditions*

317 The HEB-25 family was grown in mini-plots of 8 plants during 2014-15 and 2015-  
318 2016 (hereafter, 2015 and 2016). The experimental set-up for the mini-plots under a  
319 rain sheltered nethouse (high-content plant phenotyping; HCPP) was designed to  
320 allow whole-plant phenotype of plants, and at the same time to allow controlled  
321 irrigation with validated water deficit in the plants (Fig. S2A). Fig. S2B depicts the  
322 accumulated irrigation throughout the experiment during 2016. Assessment of the  
323 effect of WL on stomatal conductance of control plants that were distributed across  
324 the entire HCPP system, clearly indicated mild, yet statistically significant differences  
325 in the stomatal conductance between WW and WL starting at least 70 days after  
326 sowing (no porometer measurements were made in younger plants), and onward (Fig.  
327 S2C).

328 Overall, we observed a wide variation for all traits across HEB-25 and increase in  
329 the coefficient of variation under WL, i.e. mean of 28.3 vs 16.8 for all traits under WL  
330 vs WW, respectively (Fig. 1A, Table S2). WL conditions significantly reduced means  
331 of all measured traits, as compared to WW conditions, with effects on heading time  
332 (HEA) being the mildest (-1.2%). On average, plant grain yield (PGY) and grain  
333 number (GN) were reduced by -58.3% and -31%, respectively, under WL conditions,  
334 as compared to WW. Effects of WL on vegetative parts were weaker, with a -13%  
335 reduction in vegetative dry weight (VDW) and -13 % reduction in plant height (HEI).  
336 Pair-wise correlation analysis between all traits found similar relationships under both  
337 treatments, with few exceptions (Fig. 1B, Table S3). One such exception is the  
338 relationship between HEA and GN; under WW conditions there was a positive and  
339 mild correlation between these traits ( $r=0.1$ ,  $P<0.005$ ), whereas under WL, this  
340 correlation was negative ( $r=-0.23$ ,  $P<0.0001$ ).

341

342 *GWAS for QxE interactions*

343 Initially, we performed a genome scan for all 10 traits, under both treatments. For the  
344 10 traits examined in this study, 69 loci with a significant contribution to trait  
345 variation were identified (Fig. 2, Table S4). The main loci for HEA, including  
346 HvELF3, Ppd-H1, HvCEN, *denso*, Vrn-H1, and Vrn-H3, were identified. In general,  
347 at loci associated with PGY and GN the wild alleles were associated with a reduction

348 of the traits under WW conditions. Under this trait per se analysis the mean reduction  
349 of the three loci significantly associated with GN or PGY variation, respectively, were  
350 -3.4% and -9.2% under WW conditions (Table S4). Similar effects were observed  
351 under WL conditions for a locus linked with Ppd-H1 on chromosome 2 (-19.7%; -  
352 LogP=7.9) for GN.

353 Next, the GWAS model was modified to identify QTL by-environment  
354 interactions (QxE; see Methods). No significant QxE loci were identified for two of  
355 the phenological traits HEA and MAT. For the vegetative traits, only two QxE loci  
356 were identified in VDW and no significant loci were identified for plant height (Table  
357 S5). In contrast, a larger number of interactive loci were associated with PGY or GN  
358 variation (Fig. 2). In most of these loci the wild allele was characterized with a  
359 conditional beneficial effect on the trait, i.e. carriers of the wild allele were less  
360 affected by the water deficit across the two environments.

361  
362

### 363 *HsDry2.2, a major locus with non-pleiotropic QxE interactions*

364 One major locus that appeared as a pleiotropic QTL that regulates many traits is  
365 located on the long arm of chromosome 2 and delimited by SCRI\_RS\_144592 and  
366 SCRI\_RS\_165574 (54.2-59.9 cM; Fig. 3). We named this locus *Hordeum*  
367 *spontaneum* Dry 2.2 (HsDry2.2). The peak of the QxE interaction in this locus was  
368 identified at 57cM. Plotting the mean values of PGY measured for the HEB-25  
369 population under WW and WL conditions, illustrated the conditioned effect of  
370 HsDry2.2 on the trait (Fig. 4A). This is in contrast to identical effects under both  
371 growth conditions of the wild allele on HEA or VDW (no interaction; Fig. 4B; Fig.  
372 S3), i.e. reduction of the days to heading by an average of 7.7 days and 8.1 days in  
373 WW and WL, respectively. Conditioned effects on GN were more pronounced (Fig.  
374 4C), and no significant effect on mean grain weight (GW; Fig. 4D) was associated  
375 with the locus.

376 Dissection of the family-specific effects of HsDry2.2 on GN, suggested that  
377 the causal allele or alleles for this significant QxE interaction ( $P < 0.01$ ) originated  
378 from at least two wild donor. Performing the genotype to phenotype analysis in the  
379 HEB-16 family shows that plants carrying the wild HID219 allele (Maurer et al.  
380 2015) exhibited a significant reduction in GN between WW and WL (334 vs 221 in  
381 WW and WL, respectively, i.e., a reduction of 34% under water deficit) in a similar

382 manner to that of the cultivated allele carriers (Fig. S4A). On the contrary, a much  
383 milder reduction in plants carrying the wild allele was observed in the HEB-5 family  
384 (HID065 as donor) with a reduction of 7.3% from 272 to 252 for the homozygous to  
385 the wild allele (Fig. S4B). These differences translated to a family-specific positive  
386 conditioning effect of the wild barley allele under WL conditions.

387

#### 388 *The effect of HsDry2.2 in consecutive BC<sub>2</sub>S<sub>1</sub> population*

389 Plants derived from one of the HEB lines that carry the HsDry2.2 *H. spontaneum*  
390 (HID062) allele were further analyzed to validate effects on reproductive traits, as  
391 well on possible related traits. A pot experiment was carried out to evaluate the wild  
392 allele effects under optimal as well as early and late water limitation, i.e. starting at  
393 transplanting or at stem elongation stage (52 days after planting; 52DAP),  
394 respectively. Type of traits included plant productivity, phenology, canopy structure  
395 and leaf senescence.

396 **Overall plant performance:** Irrigation treatment effect was found significant for most  
397 of the measured variables (Fig. 5, Table S6). TDM under the Early WL and Late WL  
398 treatments was reduced by 31% and 26% as compare to the WW treatment,  
399 respectively. GY was reduced by 17% and 16% for the early and late WL as compare  
400 to the WW. HI increased under both WL treatments as compare to the WW (16% and  
401 12% for the early and late respectively). Leaf blade parameters -1FL width and length  
402 also exhibited reduction of 10% and 3%, and 16% and 10% for the traits and  
403 treatments respectively. Whereas all of these mentioned above traits showed similar  
404 levels under both WL treatments, both GW and senescence showed significant  
405 differences between the early and late drought: GW increased with drought level by  
406 17% and 9% for the early and late WL, and canopy senescence increased by 62% and  
407 38% for the early and late respectively (Fig. 5). About 4 days earlier heading (smaller  
408 HEA, 6%) was recorded under the Early WL relative to the WW, whereas the Late  
409 WL did not differ from the WW as expected since Late WL initiated only at 52 DAP.  
410 The number of spike per plant was also reduced by the early but not by the late WL  
411 (14%). Irrigation treatment showed no significant effect on grain number (Fig. 5).

412

#### 413 *Productivity related traits*

414 After genotyping the BC<sub>2</sub>S<sub>1</sub> plants for the three genotypic groups (Fig. S1), and  
415 observing dominant mode of inheritance for most traits (data not shown), we decided

416 to group the carrier of one or two wild alleles as a single group (hereafter Hs/\_ ) to  
417 increase the number or replicates. TDM did not differ between the Hs/\_ and the  
418 cultivated (Hv/Hv) groups averaged across treatments and under each treatment  
419 separately (Fig. 6A). However, the wild allele conferred an advantage in PGY  
420 averaged across treatments (Fig. 6B). Under the WW treatment this advantage was  
421 found most pronounced. Harvest index of the wild allele carriers was significantly  
422 higher than in the cultivated allele group, especially under the Early WL (Fig. 6C).  
423 Spike number per plant did not significantly differ between genotypes under the  
424 different treatments, or averaged across treatments (Fig. 6D). The first three spikes to  
425 boot were weighed and threshed separately. Grain number (GN) of the first 3 spikes  
426 was significantly higher in the Hs/\_ than in the Hv/Hv group (Fig. 6E). Genotype by  
427 treatment interaction curve (reaction norm) shows this effect was obtained under both  
428 the Late WL and the WW, but not under Early WL. GN of all spikes was higher  
429 ( $p=0.08$ ) for the Hs/\_ , when averaged across treatments, and under the WW treatment  
430 (Fig. 6F). While the wild allele was associated with lower GW of the first three spikes  
431 as compare to the cultivated one (mainly affected by the WW,  $P=0.06$ , Fig. 6G), an  
432 opposite trend was observed for GW of all spikes (mainly having an increasing effect  
433 at the Early WL,  $P=0.07$ , Fig. 6H).

434 **Phenology:** The first three spikes to head were used to determine plant phenology.  
435 The Hs/\_ group booted significantly earlier than Hv/Hv plants (2.5 days Fig. 7A),  
436 which was more pronounced under WW and Late WW than in the Early WL. The  
437 wild allele carriers presented an elongated ripening period across all treatments as  
438 compare to the cultivated allele (2 days, Fig. 7B).

439 **Canopy structure:** Flag leaf sheath length was higher in the Hs/\_ group (Fig. 8A and  
440 Fig. S5A). The wild allele effect was very stable in this parameter across treatments  
441 and the strongest differences between genotypes were observed under Late WL. The  
442 Hs/\_ plants exhibited constitutively reduced stem diameter (Fig. 8B and Fig. S5B).  
443 The wild allele was generally associated with longer and narrower leaves; Both  
444 'minus one' flag leaf blade width and length were found to be lower for wild allele  
445 carriers with most pronounced difference under Early WL (Fig. 8C and 8D; Fig.  
446 S5A).

447 **Leaf senescence:** Analysis of senescence carried out by calculating the difference of  
448 the yellow-brown pigments area out of total canopy area during a period of 12 days  
449 (66 and 78DAP, Fig. 9A-B). No significant differences were found in total canopy

450 area between genotypic groups in both dates, nor in yellow-brown/total at 66 DAP  
451 (not presented). However, at 78 DAP the carriers of the cultivated allele exhibited on  
452 average a significant higher yellow-brown out of total as compare to the Hs/\_ group,  
453 and greater senescence, evaluated by calculating the change in the percentage of  
454 yellow-brown out of total during these 12 days, was observed for the former (Fig.  
455 9C). Notably, these differences in senescence between the two genotypic groups were  
456 more pronounced under both drought stress (Fig. 9C).

457

458



459 **Discussion**

460 *The HEB-25 genetic architecture for flowering time*

461 The genetic architecture identified in our experiments for flowering time was similar  
462 to that reported earlier by Maurer et al. (2015) and Saade et al. (2016), with the  
463 exception of Vrn-H2 that was not identified in our study. The main loci for HEA,  
464 including HvELF3, Ppd-H1, HvCEN, *denso*, Vrn-H1, and Vrn-H3, were identified  
465 (Figs. 2 and Table S4). Nevertheless, an interesting difference between the  
466 experiment in Israel (E34°47', N31°54') and that conducted in Germany (E11°58',  
467 N51°29') was the effect of Ppd-H1 on HEA. Unlike the earliness effect of the wild  
468 allele seen in Germany, i.e. a mean 9.5-day reduction in heading time (Maurer et al.  
469 2015), under our conditions, an opposite effect was obtained, with a 6.7-day increase  
470 in mean heading time under both growth conditions. This effect is similar to that  
471 reported by Saade et al. (2016), and highlights the role of this gene in photoperiod  
472 sensitivity (Turner et al. 2005). These type of opposite effects should be considered in  
473 “designing” an ideotype or pyramiding wild QTL to achieve these in breeding. These  
474 type of QTL originated from wild alleles could be beneficial in one environment and  
475 detrimental in other.

476

477

478 *Genome scan for QxE interactions*

479 In this study, a genome scan was performed in search for loci with significant QxE  
480 interactions, as manifested by environmentally-conditioned differences in mean trait  
481 measures between the carriers of the wild allele (Hs/Hs) as compared to plants  
482 homozygous for the cultivated allele (Hv/Hv). This approach is different from recent  
483 QxE analysis in Arabidopsis, in which analysis was performed in two stages: initially  
484 performing a genome scan for loci that are associated with the trait variation per-se  
485 regardless of the environment, mainly to maximize QTL identification, and only then  
486 the QxE interactions for these loci was tested (El-Soda et al. 2014). In addition, it is  
487 different from the way GxE is often treated as a variation component that would  
488 improve the percentage variation explained by the genetic model (Elias et al. 2016).  
489 HsDry2.2 is an excellent example of a major QxE locus (Fig. 3) for reproductive  
490 output traits (PGY and GN) that was not identified by GWAS for the trait per-se in  
491 neither WW nor WL conditions (Fig. 2, Table S4-5). Yet, when the genome scan was

492 screened for QxE, it was highlighted as the most reproducible QxE locus with similar  
493 effects observed over two years of field trials.

494

495 *Prevalence of QxE QTL for reproductive rather than vegetative or phenological traits*

496 In this study we were able to identify 69 loci for trait per-se and 22 for QxE (Fig. 2;  
497 Table S4 and S5 respectively). In general, comparison of the QxE genomic  
498 architecture to that of the traits variation per-se shows that there are very few QxE  
499 loci for some of the traits. Moreover, some bias for reproductive trait-associated QxE  
500 loci was apparent (Supplementary Tables S4 and S5). This does not seem to be the  
501 result of the limited variation of vegetative or phenological traits in the HEB-25 lines  
502 under our experimental set-up (Fig. 1A). Moreover, we were able to identify 69 loci  
503 for trait per-se and 22 for QxE (Fig. 2; Table S4 and S5 respectively).

504 Interestingly, the prevalence for conditional QTL is by far more prevalent for  
505 PGY or GN as compared to other traits in which the large number of QTL for trait per  
506 se was dramatically reduced while considering interaction. Looking more carefully on  
507 the reaction norms of such QTL (Fig. 4 and Fig. S3) show that the carrier of the wild  
508 allele experienced less reduction under WL rather than simply increasing the PGY or  
509 GN i.e. the wild allele is conferring phenotypic stability under changes in the watering  
510 regime. Although this is shown for a semi-controlled environment and requires  
511 validation under a denser agricultural set-up, such locus has a promising potential to  
512 provide grain yield stability against drought. Future experiments should therefore test  
513 isogenic lines for this wild allele in several genetic backgrounds and with larger plots.

514 It is argued that since drought survival is a trait under strong evolutionary  
515 pressure, many drought survival loci would be expected to impart tolerance in crop  
516 plants by accumulation of small effect QTL (Mickelbart et al. 2015). However, when  
517 considering grain yield and exploitation of interspecific crosses, such as the HEB-25,  
518 one caveat should be considered. Wild relatives of modern crops adapt to drought, not  
519 necessarily by producing more grains under stress, a strategy that might be  
520 detrimental for maintenance of wild populations under limited and fluctuating  
521 resources. Instead, upon dissection of the wild genome and examining its parts in a  
522 cultivated genetic background, as in our study, we would not necessarily expect to  
523 find alleles from the wild that would increase grain number and yield under stress.  
524 Rather, the alleles that we expect to find are such that stabilize or buffer the effects of  
525 the stressful environment on the plant. For example, owing to the wide allelic

526 variation existing in the HEB-25, we were able to identify several significant QxE  
527 loci, including a major locus that implicates a hitherto unknown role for a “flowering  
528 time gene” in regulating drought resilience in what seems as a non-escape  
529 mechanism. The pot experiment showed similar trend of shortening time to flowering  
530 (only ~2.5days) of the wild allele as compare to the cultivated one. The much earlier  
531 general heading date in the pot experiment (~65days), as compare to the field trails  
532 (~100days), is probably related to differences in thermal degrees days between  
533 experiments (Fig S6). Hence, in the relatively hot climate of the pot experiment HEA  
534 was reduced for both alleles, therefore maintaining the differences between them yet  
535 to a lesser extent in the pots than in the field. Furthermore, under these hot conditions  
536 both genotypes flowered early, ruling out drought escape mechanism of one allele  
537 compared to the other. Alternatively, the earlier flowering and elongated grain filling  
538 of the wild allele may in part underlie its improved productivity.

#### 539 *Flowering-independent QxE effects of HsDry2.2 on reproductive traits*

540 The most reproducible and significant QxE locus was identified on the long arm of  
541 chromosome 2H (Fig. 2,3). Interestingly, this position matches the location of the  
542 HvCEN, the barley ortholog of the CENTRORADIALIS gene, with two main  
543 haplotypes differentially distributed over spring and winter barley varieties  
544 (Comadran et al., 2012). Under WL conditions, HsDry2.2 showed conditional effects  
545 on the total plant grain number, but no such interaction with flowering time (Fig. 4).

546 Both field trails and pot experiment shows that the wild allele had no  
547 advantage over the cultivated one in vegetative or TDM production, yet , it shows  
548 superiority in terms of reproductively (PGY and HI). This phenotype presented is  
549 most probably not related to gibberellin insensitivity mechanism, as plant height of  
550 wild allele carriers was not modified compare to the cultivated allele. Most recently  
551 loci regulating developmental characteristics were found to be co-located with  
552 flowering time gene including the HvCEN (Maurer et al., 2016 and Nice et al., 2017).  
553 Yet, this locus was not associated with height differences in this study either (Nice et  
554 al., 2017). Maurer et al. (2016) found significant effects of 'QTL-2H-7' (with HvCEN  
555 as candidate gene) on all measured traits, however they did not measure yield. It  
556 would therefore be interesting to further characterize these differences at the  
557 metabolic and developmental levels, both in the sink and source tissues, under  
558 gradients of water availability for isogenic lines for this QxE locus. This may lead to  
559 the identification of hitherto unknown pathways related to drought tolerance.

560

561 *HsDry2.2 effects under early vs. late drought*

562 Despite the similarity in PGY production for the Early and Late WL treatments, it is  
563 quite clear that the reduction was obtained via different pathways. As expected, while  
564 spike/plant was significantly reduced by the Early WL, in the Late treatment it did  
565 not. GW (all) under the Late WL was reduced half of that of the Early WL, and GN  
566 appears to be reduced only in the Early WL, although not significantly (Table S6).

567 As temperatures in the greenhouse were high along the entire season (Fig S6), it  
568 is reasonable to assume that all treatments plants were under mild heat stress. In  
569 addition, as plant water demand grew towards the middle of the season, the field  
570 water capacity dropped beneath 60% in the WW when irrigating once in two days  
571 (and not daily). Therefore, the advantage in PGY for the wild allele, which was  
572 obtained mainly under WW might reflect also heat resistance.

573 Whereas under the WW treatment the benefit of the wild allele in PGY may be  
574 attributed to higher GN, under both WL treatments the wild allele presented an  
575 advantage in GW, ripening period, and reduced senescence rate. In that respect, the  
576 condensed canopy structure of the drought adapted wild allele under Early WL may  
577 also have an effect on reduced senescence rate as a 'by product' of this phenotype.

578 Overall, the Hs\_ plants presented a phenotype that matches the design of future  
579 climate-resilient barley ideotypes for Mediterranean climatic zones based on crop  
580 models (Tao et al. 2017), i.e. longer reproductive growing period (similar to longer  
581 RIP), lower leaf senescence rate, and higher drought tolerance. This matching indicate  
582 the importance of this QTL for future breeding of barley.

583 Notably, resequencing the hitherto known SNP between spring and winter  
584 barley in the segregating BC<sub>2</sub>S<sub>1</sub> plants show that both Hs and Hv alleles (Fig. S7,  
585 Table S1) are in fact carrying G at this position termed Pro135A by (Comardan et al.  
586 2012). These results may indicate that the casual variation underlying the improved  
587 drought resistance of Hs over Hv allele in this study may be attributed to other  
588 variation than this SNP, i.e. that there is another allele that cause these effects.  
589 Possibly, this could also be other gene rather than the HvCEN itself, which is locked  
590 with this chromosomal region as was shown recently (Mascher et al. 2017), and  
591 therefore dissecting the true causal variation in this region is still challenging

592 Overall, the current study goes from large-scale genome-wide association  
593 scan to a finer resolution scale, shedding some more light over the promising

594 HsDry2.2 locus and its mode of action. This seems like a rare case of wild allele with  
595 direct beneficial effects on grain yield. Finer mapping of this locus should validate if  
596 indeed the causal gene for these multiple differences between wild and cultivated  
597 allele correspond to the CEN or nearby overlooked gene/s.

598

599

600

601 **Supplementary data:**

602

603 **Table S1.** Primers used for HRM and HvcEN sequencing

604 **Table S2.** Field distribution of traits values under WW and WL

605 **Table S3.** Field pairwise correlations between traits under WW and WL

606 **Table S4.** GWAS results for trait per se.

607 **Table S5.** QxE loci for the different traits

608 **Table S6.** Pot experiment ANOVA

609

610 **Fig. S1.** Genotyping BC<sub>2</sub>F<sub>1</sub> pot experiment

611 **Fig. S2.** Irrigation management

612 **Fig. S3.** Field VDW reaction norms

613 **Fig. S4.** Field family reaction norms

614 **Fig. S5.** Pot experiment shoot morphology

615 **Fig. S6.** Pot experiment temperatures

616 **Fig. S7.** HvcEN sequencing

617

618

619 **Acknowledgements**

620 We wish to thank Yoske Gotlib and the staff of the Experimental Farm at the Faculty  
621 of Agriculture, Rehovot), Matan Koren, Khaled Bishara ,Oshreet Finer and Ira  
622 Bartkiv (ARO, Bet Dagan) for their technical assistance. The discussions and  
623 technical assistance of Prof. Menachem Moshelion (The Hebrew University) were  
624 instrumental for setting the high-content phenotyping system. We also thank Yehudit  
625 Posen for editing the manuscript. The ERA CAP Grant Pi339/8-1 to K.P and E.F  
626 supported this research. The authors declare that they have no conflict of interest

627

628

629

630

631 **Contributions**

632 R.S., L.O.M, E.L and E.F. designed the experiments, collected the data, made the data  
633 analysis and interpretations and wrote the manuscript. A.F. and L.O.M. were involved  
634 in the data analysis, its interpretations and assisted in writing the manuscript. K.P. and  
635 A.M. supplied the plant material and genotype data.

## References

- Albacete AA, Martínez-Andújar C, Pérez-Alfocea F.** 2014. Hormonal and metabolic regulation of source-sink relations under salinity and drought: From plant survival to crop yield stability. *Biotechnology Advances* **32**:12–30.
- Araus JL, Slafer G a., Royo C, Serret MD.** 2008. Breeding for yield potential and stress adaptation in cereals. *Critical Reviews in Plant Sciences* **27**:377–412.
- Bedada G, Westerbergh A, Müller T, et al.** 2014. Transcriptome sequencing of two wild barley *Hordeum spontaneum* L. ecotypes differentially adapted to drought stress reveals ecotype-specific transcripts. *BMC Genomics* **15**:995.
- Blum A.** 2005. Drought resistance, water-use efficiency, and yield potential—are they compatible, dissonant, or mutually exclusive? *Australian Journal of Agriculture Research* **56**:1159–1168.
- Boyer JS.** 1982. Plant productivity and environment. *Science* **218**:443–448.
- Buckler ES, Holland JB, Bradbury PJ, et al.** 2009. The genetic architecture of maize. *Science* **325**:714–718.
- Cattivelli L, Rizza F, Badeck FW, et al.** 2008. Drought tolerance improvement in crop plants: An integrated view from breeding to genomics. *Field Crop Research* **105**:1–14.
- Comadran J, Kilian B, Russell J, et al.** 2012. Natural variation in a homolog of *Antirrhinum CENTRORADIALIS* contributed to spring growth habit and environmental adaptation in cultivated barley. *Nature Genetics* **44**:1388–92.
- Comadran J, Russell JR, Booth A, et al.** 2011. Mixed model association scans of multi-environmental trial data reveal major loci controlling yield and yield related traits in *hordeum vulgare* in mediterranean environments. *Theoretic Applied Genetics*. **1227**:1363-1373.
- Druka A, Sato K, Muehlbauer GJ.** 2010. *Genome Analysis: The State of Knowledge of Barley Genes*, in *Barley: Production, Improvement, and Uses* ed S. E. Ullrich, Wiley-Blackwell, Oxford, UK.
- El-Soda M, Malosetti M, Zwaan BJ, et al.** 2014. Genotype by environment interaction QTL mapping in plants: Lessons from *Arabidopsis*. *Trends in Plant Sciences*. **19**:390–398.
- Elias AA, Robbins KR, Doerge RW, Tuinstra MR.** 2016. Half a century of studying genotype by environment interactions in plant breeding experiments.

- Crop Sciences **56**:2090–2105.
- Ellis RP, Forster BP, Robinson D, et al.** 2000. Wild barley: a source of genes for crop improvement in the 21st century? *Journal of Experimental Botany* **51**:9–17.
- Fulton TM, Grandillo S, Beck-Bunn T, et al.** 2000. Advanced backcross QTL analysis of a *Lycopersicon esculentum* x *Lycopersicon parviflorum* cross. *Theoretic Applied Genetics* **100**:1025–1042.
- Kirigwi FM, Van Ginkel M, Brown-Guedira G, et al.** 2007. Markers associated with a QTL for grain yield in wheat under drought. *Molecular Breeding* **20**: 401–413.
- Korte A, Vilhjálmsson BJ, Segura V, et al.** 2012. A mixed-model approach for genome-wide association studies of correlated traits in structured populations. *Nature Genetics* **44**:1066–71.
- Loscos J, Igartua E, Contreras-Moreira B, Gracia MP, & Casas, AM.** 2014. HvFT1 polymorphism and effect—survey of barley germplasm and expression analysis. *Frontiers in Plant Science* **5**.
- Mascher M, Schuenemann VJ, Davidovich U, et al.** 2016. Genomic analysis of 6,000-year-old cultivated grain illuminates the domestication history of barley. *Nature Genetics* **48**:1089–1093.
- Maurer A, Draba V, Jiang Y, et al.** 2015. Modelling the genetic architecture of flowering time control in barley through nested association mapping. *BMC Genomics* **16**:290.
- Maurer A, Draba V, Pillen K.** 2016. Genomic dissection of plant development and its impact on thousand grain weight in barley through nested association mapping. *Journal of Experimental Botany* doi: 10.1093/jxb/erw070
- Mickelbart MV, Hasegawa PM, Bailey-Serres J.** 2015. Genetic mechanisms of abiotic stress tolerance that translate to crop yield stability. *Nature Review Genetics* **16**:237–251.
- Nice, LM, Steffenson BJ, Blake TK, Horsley, RD, Smith KP, & Muehlbauer GJ.** 2017. Mapping Agronomic Traits in a Wild Barley Advanced Backcross–Nested Association Mapping Population. *Crop Science*.
- Pillen K, Zacharias A, Leon J.** 2003. Advanced backcross QTL analysis in barley *Hordeum vulgare* L. *Theoretic and Applied Genetics* **107**:340–352.
- Rollins JA, Habte E, Templer SE, et al.** 2013. Leaf proteome alterations in the context of physiological and morphological responses to drought and heat stress



- in barley *Hordeum vulgare* L. *Jornal of Experimental Botany* **64**:3201–3212.
- Saade S, Maurer A, Shahid M, et al.** 2016. Yield-related salinity tolerance traits identified in a nested association mapping NAM population of wild barley. *Sciences Rep* **6**:1–9.
- Talamè V, Sanguineti MC, Chiapparino E, et al.** 2004. Identification of *Hordeum spontaneum* QTL alleles improving field performance of barley grown under rainfed conditions. *Annals Applied Biology* **144**:309–319. 7348.2004.tb00346.x
- Tao F, Rötter RP, Palosuo T, Díaz-Ambrona CG, et al.** 2017. Designing future barley ideotypes using a crop model ensemble. *European Journal of Agronomy*.**82**:144-62.
- Tanksley SD, Nelson JC.** 1996. Advanced backcross QTL analysis: A method for the simultaneous discovery and transfer of valuable QTLs from unadapted germplasm into elite breeding lines. *Theoretic and Applied Genetics* **92**:191–203.
- Tester M, Langridge P.** 2010. Breeding technologies to increase crop production in a changing world. *Science* **327**:818–822.
- Teulat B, Zoumarou-Wallis N, Rotter B, et al.** 2003. QTL for relative water content in field-grown barley and their stability across Mediterranean environments. *Theoretic and Applied Genetics* **108**:181-188.
- Thomas D.** 2010. Gene--environment-wide association studies: emerging approaches. *Nature Review Genet* **11**:259–72.
- Turner A, Beales J, Faure S, et al.** 2005. The pseudo-response regulator Ppd-H1 provides adaptation to photoperiod in barley. *Science* **310**:1031–4.
- von Korff M, Léon J, Pillen K.** 2010. Detection of epistatic interactions between exotic alleles introgressed from wild barley *H. vulgare* ssp. *spontaneum*. *Theoretic and Applied Genetics* **121**:1455–1464.
- Von Korff M, Wang H, Léon J, Pillen K.** 2006. AB-QTL analysis in spring barley: II. Detection of favourable exotic alleles for agronomic traits introgressed from wild barley *H. vulgare* ssp. *spontaneum*. *Theoretic and Applied Genetics* **112**:1221–1231.
- Von Korff M, Wang H, Léon J, Pillen K.** 2005. AB-QTL analysis in spring barley. I. Detection of resistance genes against powdery mildew, leaf rust and scald introgressed from wild barley. *Theoretic and Applied Genetics* **111**:583–590.
- Von Korff M, Wang H, Léon J, Pillen K.** 2008. AB-QTL analysis in spring barley:

III. Identification of exotic alleles for the improvement of malting quality in spring barley *H. vulgare* ssp. *spontaneum*. *Molecular Breeding* **21**:81–93.

**Wheeler T, von Braun J, Garnett T, et al.** 2013. Climate change impacts on global food security. *Science* **341**:508–13.

**Zamir D.** 2001. Improving plant breeding with exotic genetic libraries. *Nature Reviews Genetics* **2**:983–989.

## **Figures legends**

**Fig. 1** Distribution and correlation matrix of the measured traits under WW and WL conditions. (A) The distribution of the traits is presented for the HEB-25 lines for the WW (blue) and WL (orange) irrigation conditions (see detailed values in Table S1). Blue and orange arrows facing down depict the mean values of the HEB-25 population under WW and WL environments. (B) Scatter plot of the pairwise correlations between the 10 traits under WL (X-axis) and WW (Y-axis). HEA, days from sowing to anthesis; MAT, days from sowing to maturation; GFP, Grain filling period [days]; HEI, plant height [cm]; VDW, vegetative dry matter [gr]; TDM, total dry matter [gr]; PGY, plant grain yield [gr]; GN, grain number [#]; GW, grain weight [mg].

**Fig. 2** Circos plot depicting the GWAS results for trait per-se (QTL) and interaction with environment (QxE). Barley chromosomes in the Circos plot are depicted in different colors the inner circle and centromeres are indicated by transparent boxes. For each trait, the first (inner) track represents the  $-\text{Log}_{10}P$  score of QTL detection in a 5-cM window and the adjacent outer track represents the effect of this QTL. The maximum height of the effect bars is 10.03 days for HEA, 17.34 cm for HEI, 24.3 for HI, 22.5 for GN, 22.44 for PGY and 23.04 for VDW. Window positions (in cM, as per Maurer *et al.* 2015) are ordered clockwise, per chromosome. In the inner track, QTL appearing under WW and WL conditions are presented by black and gray bars, respectively. The QTLs showing significant QxE interactions are represented by green bar. The effect of the QTL conferred by the wild allele relative to Barke is represented on the outer track, where blue and red bars indicate decreasing and increasing wild barley QTL effects, respectively, for each treatment. Genes potentially explaining the observed QTL effects, are indicated inside the inner circle.

**Fig. 3** Genetic mapping of the genome wide association for QxE interactions for PGY in chromosome 2. Manhattan plot depicting the location of *HsDry2.2* locus on the long arm according to genetic map. The Y axis depicts the  $-\log(P)$  value of the QxE interaction. It is delimited by SCRI\_RS\_144592 and SCRI\_RS\_165574 (54.2-59.9 cM), peaking at 57cM.

**Fig. 4** Least square mean value comparisons for the *HsDry2.2* genotypes under WW versus WL (reaction norms) conditions, in the whole HEB-25 population. Reaction norms for (A) plant grain yield (PGY), (B) days from sowing to heading (HEA), (C) grain number (GN), and (D) grain weight (GW). The three genotypic groups of plants

homozygous for the Barke cultivated allele (Hv/Hv), homozygous for the wild allele (Hs/Hs) and heterozygous (Hv/Hs) are depicted by blue, orange and gray lines, respectively.

**Fig. 5** Effect of irrigation treatment on the different parameters evaluated: total DM (TDM, gr/plant), grain yield (PGY, gr/plant), harvest index (HI), spike per plant, grain number of three first spike (GN- first three), GN all, grain weight of three first three spike (GW- first three), GW, all, days from planting to booting (HEA, days) ripening period (RIP, days), flag leaf (FL) sheath length (cm), stem diameter (cm), -1 FL blade width (cm), -1 FL blade length, and senescence.

**Fig. 6** Genotype and genotype by environment interaction curves of HsDry2.2 for productivity related traits: (A) total DM (TDM, gr/plant), (B) plant grain yield (PGY, gr/plant), (C) harvest index (HI), (D) spike per plant, (E) grain number of three first spike (GN- first three), (F) grain number (GN all), (G) grain weight of three first spike (GW- first three), (H) grain weight (GW, all). Hv/Hv, homozygous for the Barke cultivated allele, Hs/\_ homozygous or heterozygous for the wild HID062 allele.

**Fig. 7** Genotype and genotype by environment interaction curves for phenological traits: (A) days from planting to booting (HEA, days), (B) ripening period from HEA to maturity (RIP, days). Hv/Hv, homozygous for the Barke cultivated allele, Hs/\_ homozygous or heterozygous for the wild HID062 allele.

**Fig. 8** Genotype and genotype by environment interaction curves for canopy structure traits: (A) Flag leaf sheath (cm) length, (B) stem diameter (cm), (C)-1 flag leaf blade width (cm), (D)-1 flag leaf blade length. Hv/Hv, homozygous for the Barke cultivated allele, Hs/\_ , homozygous or heterozygous for the wild HID062 allele.

**Fig. 9** The HsDry2.2 is associated with reduced leaf senescence under drought (A) Representative plant images used for analysis of senescence (Early WL), as the difference of the yellow-brown pigments out of total canopy area between two sets of photos taken at 66 and 78DAP. Analysis was conducted using a designate home-designated software (see Methods). (B) Genotype and genotype by environment interaction curves for leaf senescence. Hv/Hv, homozygous for the Barke cultivated allele, Hs/\_ , homozygous or heterozygous for the wild HID062 allele.

**Fig. S1** (A) High resolution melting analysis for the peak marker BOPA2\_12\_30265 for the genotyping of BC<sub>2</sub>F<sub>2</sub> (self of backcrossing line HEB-04-96) segregating

population in the HsDry2.2 locus. (B) Sanger sequencing showing the different alleles for the BOPA2\_12\_30265 SNP.

**Fig. S2** The effects of water limitation on control plants grown in a semi-controlled, high content plant phenotyping (HCPP) set-up. (A) The experimental set up for the 2015 and 2016 experiments included the HEB-25 lines and control plants. Plants were grown in pairs of troughs, under well-watered (WW) or water-limited (WL) conditions. (B) Accumulated irrigation and (C) stomatal conductance as a function of days from sowing, under the WW (blue) or WL (red) conditions, during 2016. (D) A panoramic view over the pot experiment at ripening stage. (E) Field capacity (%) as a function of days after planting (DAP) for the different genotypes. Seedlings were planted into small pots (60g soil and 300g water, 100% field capacity), at 28 DAP plants were transplanted into medium pots (190g soil and 1170g water), and at 52 DAP plants were into large pots (460g soil and 2500g water). The Early WL initiated at planting and the Late WL at 52 DAP, about two weeks before booting. Pots were weighed manually before and after irrigation, keeping the well-watered (WW) pots between 60-90% of field capacity and the water limited pots (WL) at 40-60%. (F) Stomatal conductance measured for cv. Barke control at 56 and 69 DAP under the different irrigation treatments.

**Fig. S3** Reaction norm of HsDry2.2 is illustrating the mean values of vegetative dry matter (VDW) under WW and WL conditions, in the whole HEB-25 population. The three genotypic groups of plants homozygous for the Barke cultivated allele (Hv/Hv), homozygous for the wild allele (Hs/Hs) and heterozygous (Hv/Hs) are depicted by blue, red and gray lines, respectively.

**Fig. S4** Reaction norms of HsDry2.2 are illustrating the mean values of plant grain number (GN) under WW and WL (reaction norms) conditions, in the a) HEB-16 and b) HEB-05 families. Homozygous for the Barke cultivated allele (Hv/Hv) and for the wild allele (Hs/Hs) are depicted by blue and gray lines, respectively. Heterozygous plants were excluded from analysis due to low number of replicates (<6).

**Fig. S5** (A) Representative photos for canopy structure modifications, showing the carriers of the wild allele (Hs/\_ ) have on average longer sheath, and narrower-shorter leaf blades (of FL and -1FL). (B) Stem cuts after harvest at the base of the spike (Late WL) showing Hs/\_ plants to have reduced stem diameter, which also appear to be thicker than in the cultivated allele.

**Fig. S6** Air minimum and maximum daily temperatures monitored over the pot experiment season.

**Fig. S6** Sanger sequencing results for the known SNP between spring and winter barley in the segregating BC2S1 plants. Both Hs and Hv alleles are in carrying G at this position termed Pro135A by Comardan et al. (2012) whereas additional cv Barke control plants experiment are shown to carry C.

**Table S1.** Distribution and heritabilities of traits values under WW and WL. Wide-sense heritability is calculated by ANOVA as the proportion of the phenotypic variation explained by the genotype (family) effect in a multi-factorial model.

**Table S2.** Pairwise correlations between traits under WW and WL

**Table S3.** GWAS results for trait per se. The effect correspond to the percent difference between mean phenotypic value of homozygous for the wild allele compare to carriers of the cultivated Barke allele within the whole HEB-25 population

**Table S4.** GWAFF results for QxE. The effect is calculated as the difference between the effect of the wild allele under WW and WL. Positive values indicate higher increasing or less reducing effect of the wild allele under WL.

**Table S5.** Least square means of the measured traits: total DM (TDM, gr/plant), plant grain yield (PGY, gr/plant), harvest index (HI), spike per plant, grain number of three first spike (GN- first three), grain number (GN all), grain weight of three first spike (GW- first three), grain weight (GW, all), days from planting to booting (HEA, days), ripening period (RIP, days), Flag leaf sheath (cm) length, stem diameter (cm), -1 flag leaf blade width (cm), -1 flag leaf blade length.

**Table S6.** Analysis of variance (ANOVA) for the measured traits: total DM (TDM, gr/plant), plant grain yield (PGY, gr/plant), harvest index (HI), spike per plant, grain number of three first spike (GN- first three), grain number (GN all), grain weight of three first spike (GW- first three), grain weight (GW, all), days from planting to booting (HEA, days), ripening period (RIP, days), Flag leaf sheath (cm) length, stem diameter (cm), -1 flag leaf blade width (cm), -1 flag leaf blade length.

Figure 1

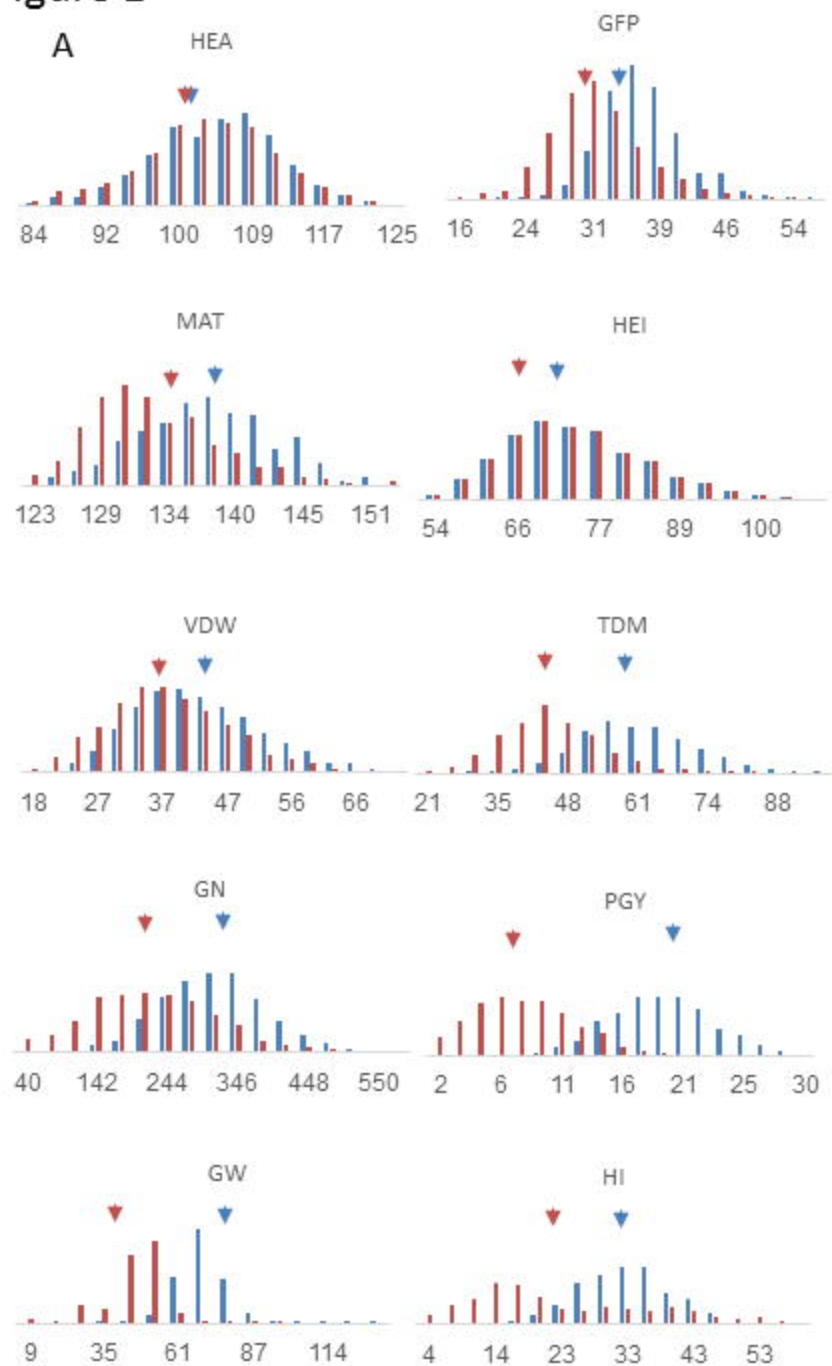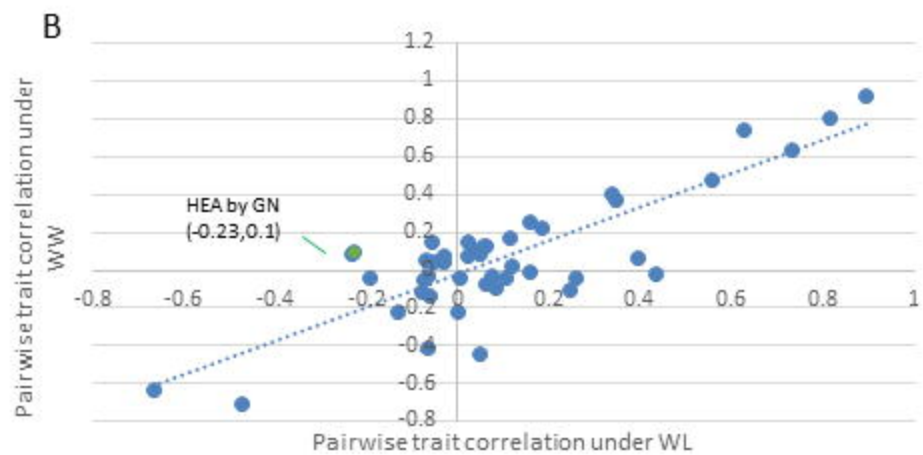

Figure 2

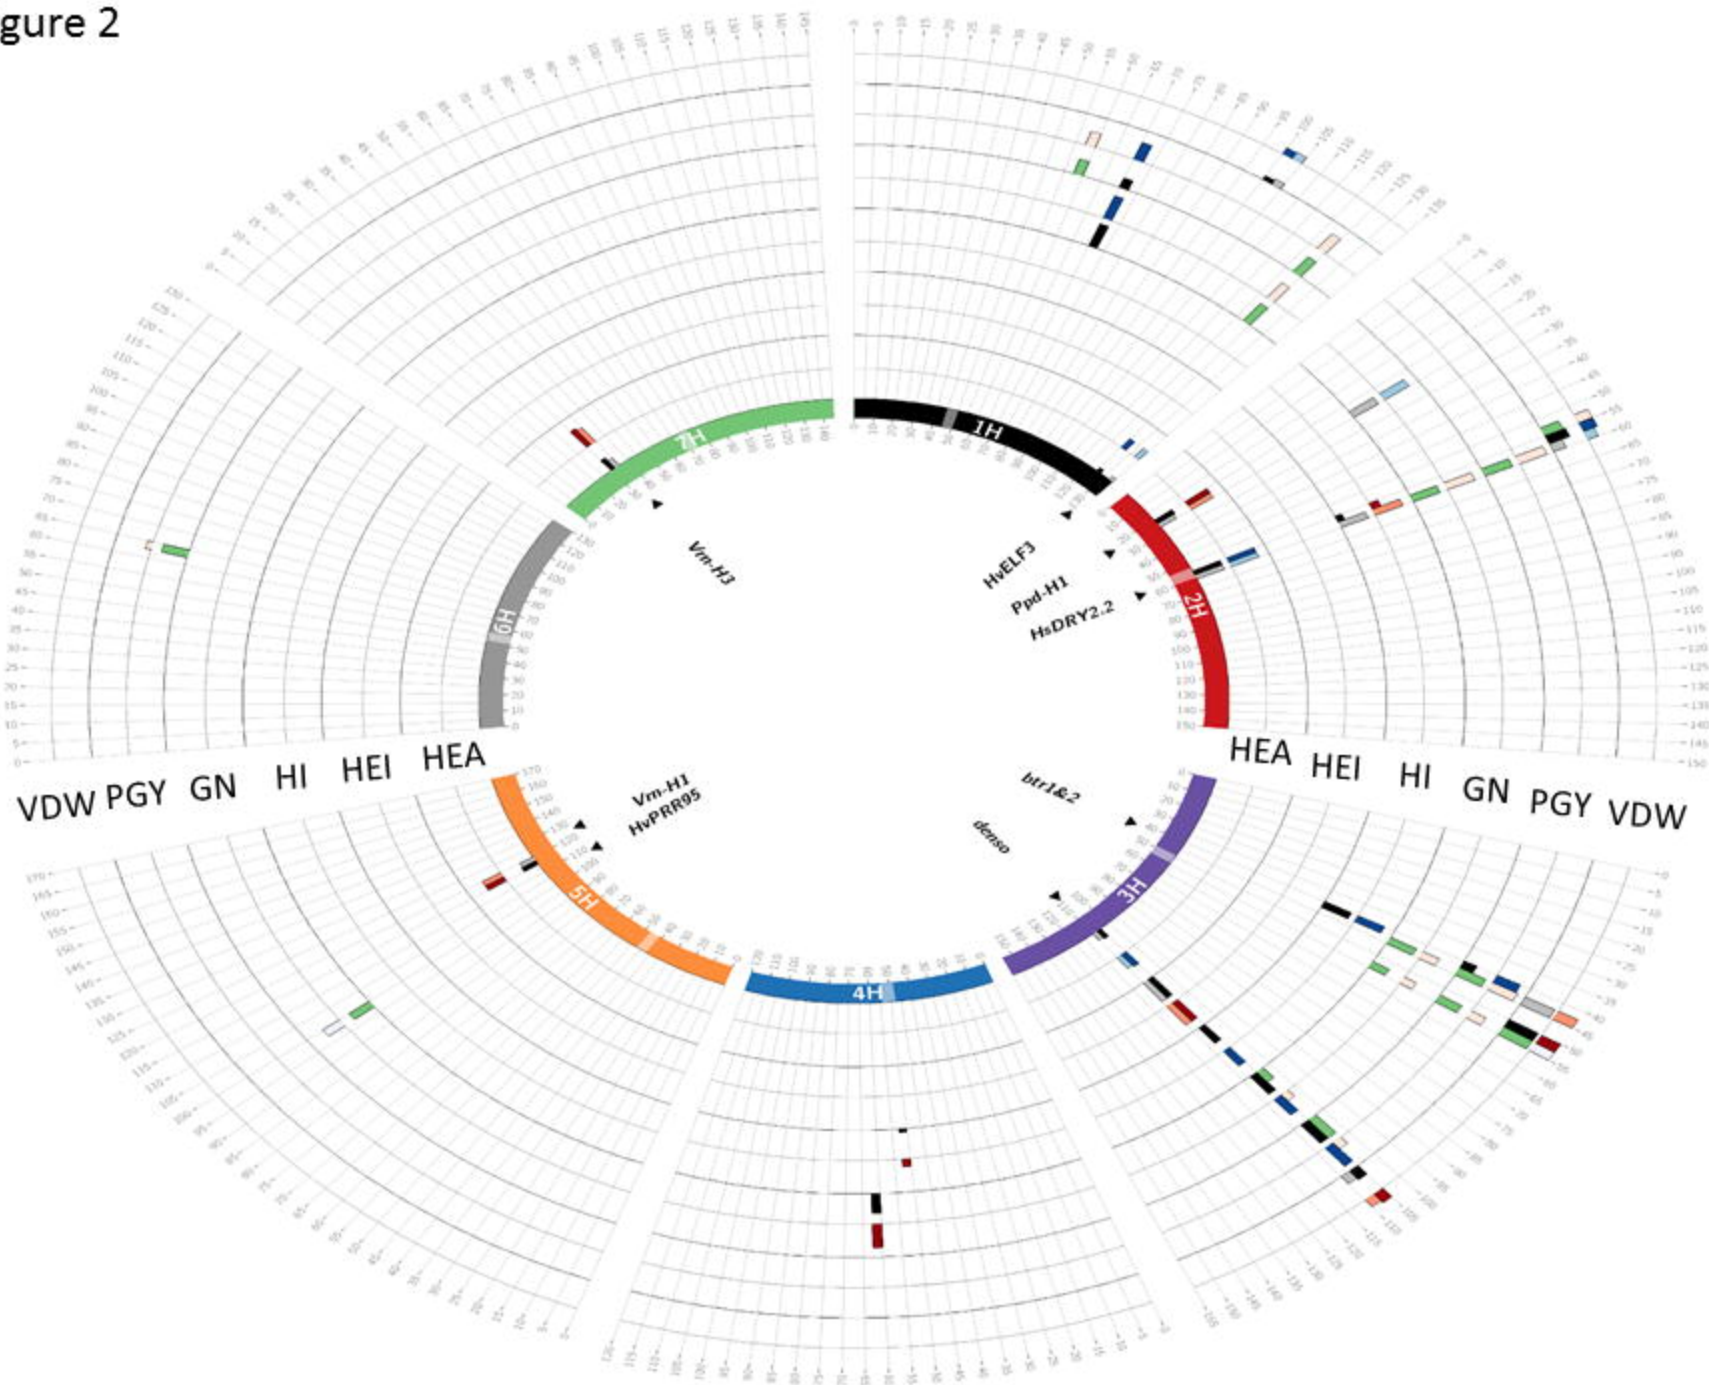



Figure 3

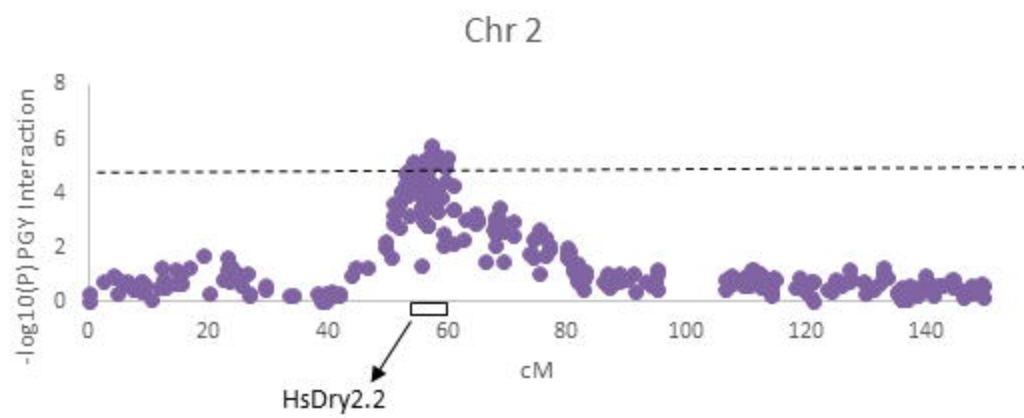

Figure 4

A

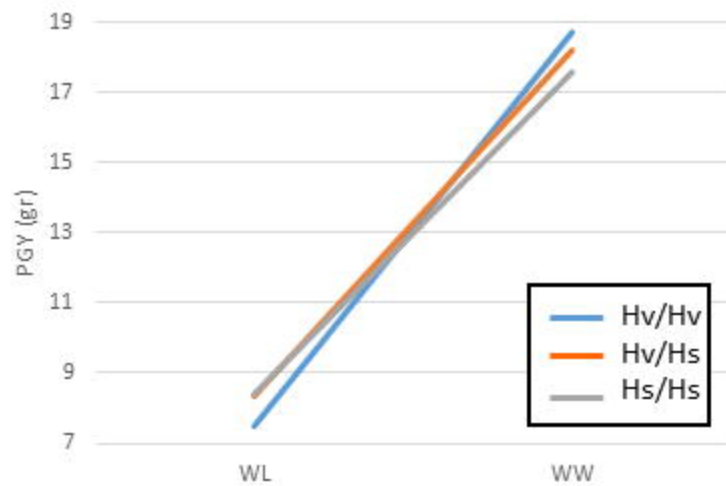

B

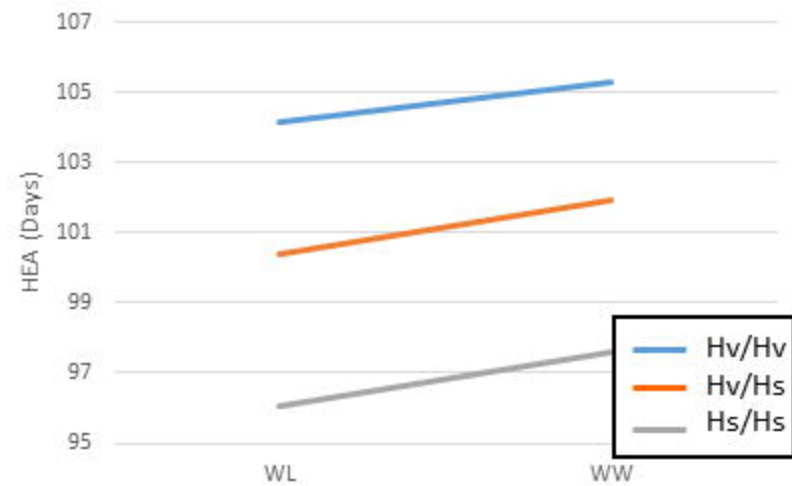

C

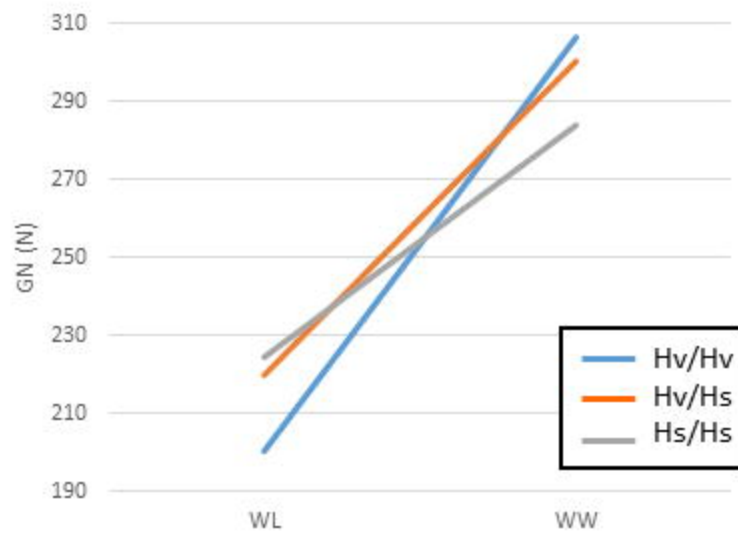

D

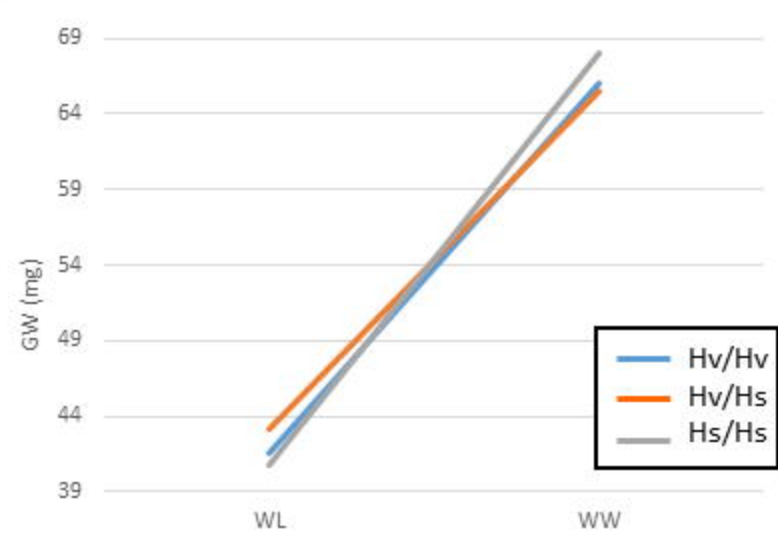

Figure 5

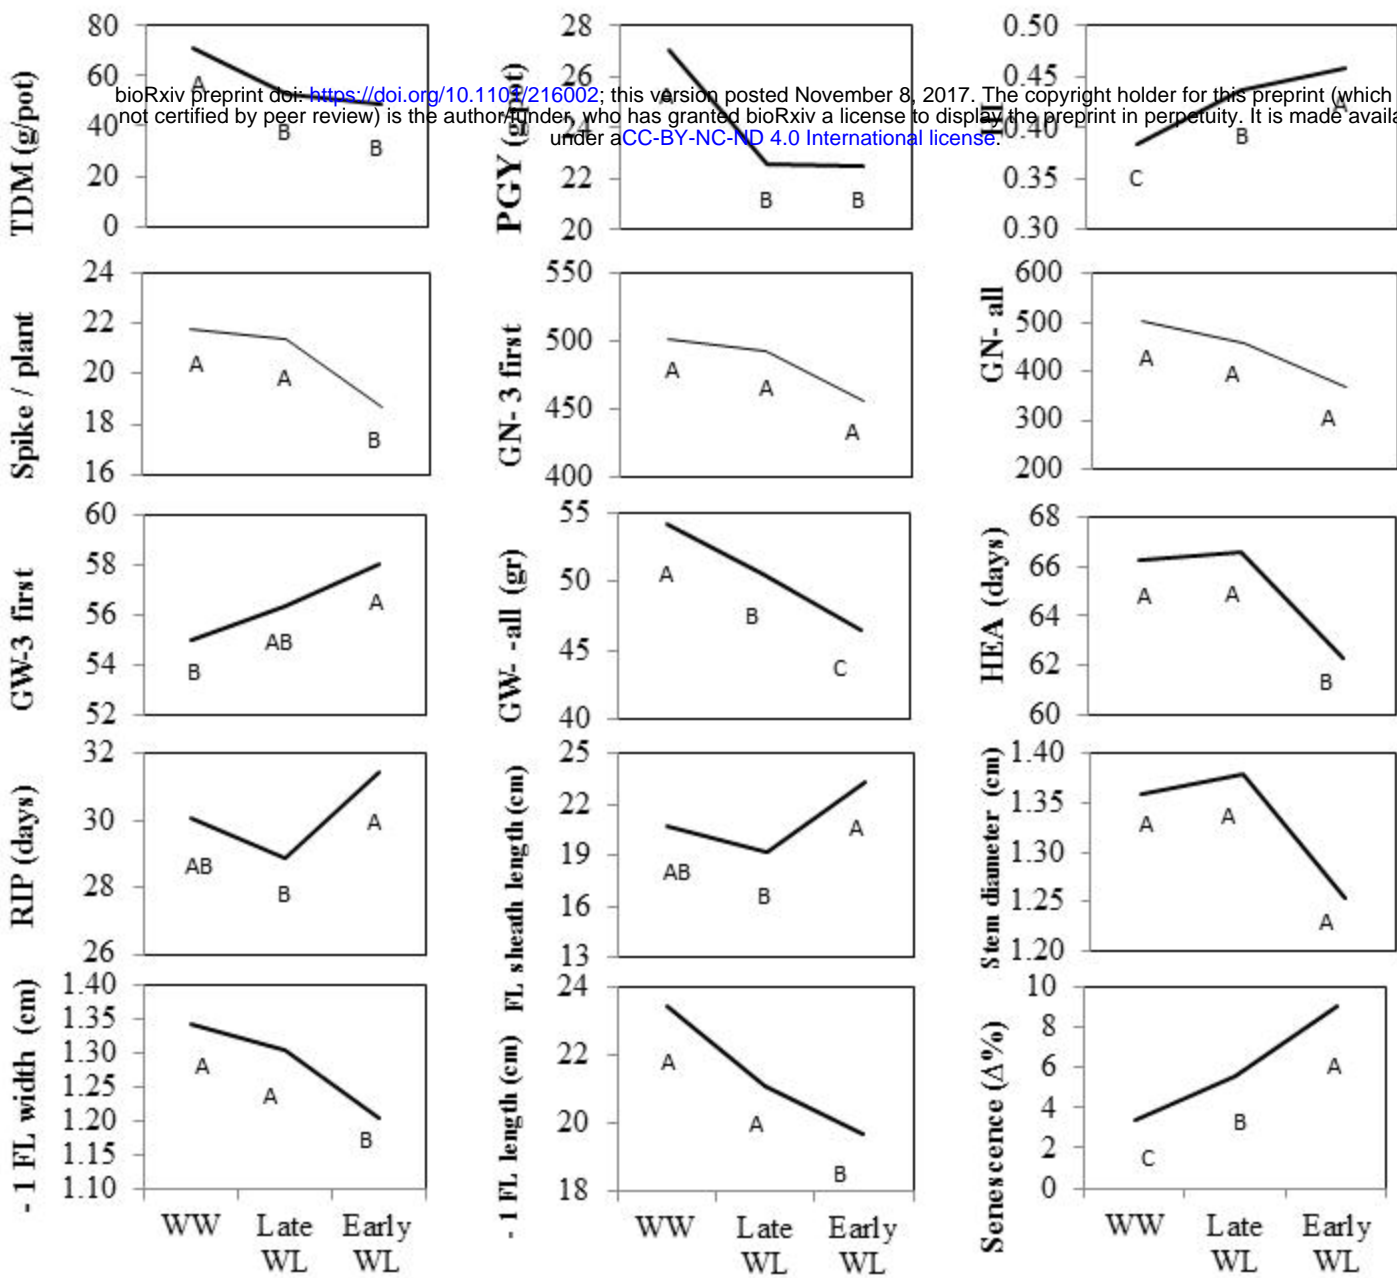

Different letters represent significance level of  $p < 0.05$  in a students t-test

Figure 6

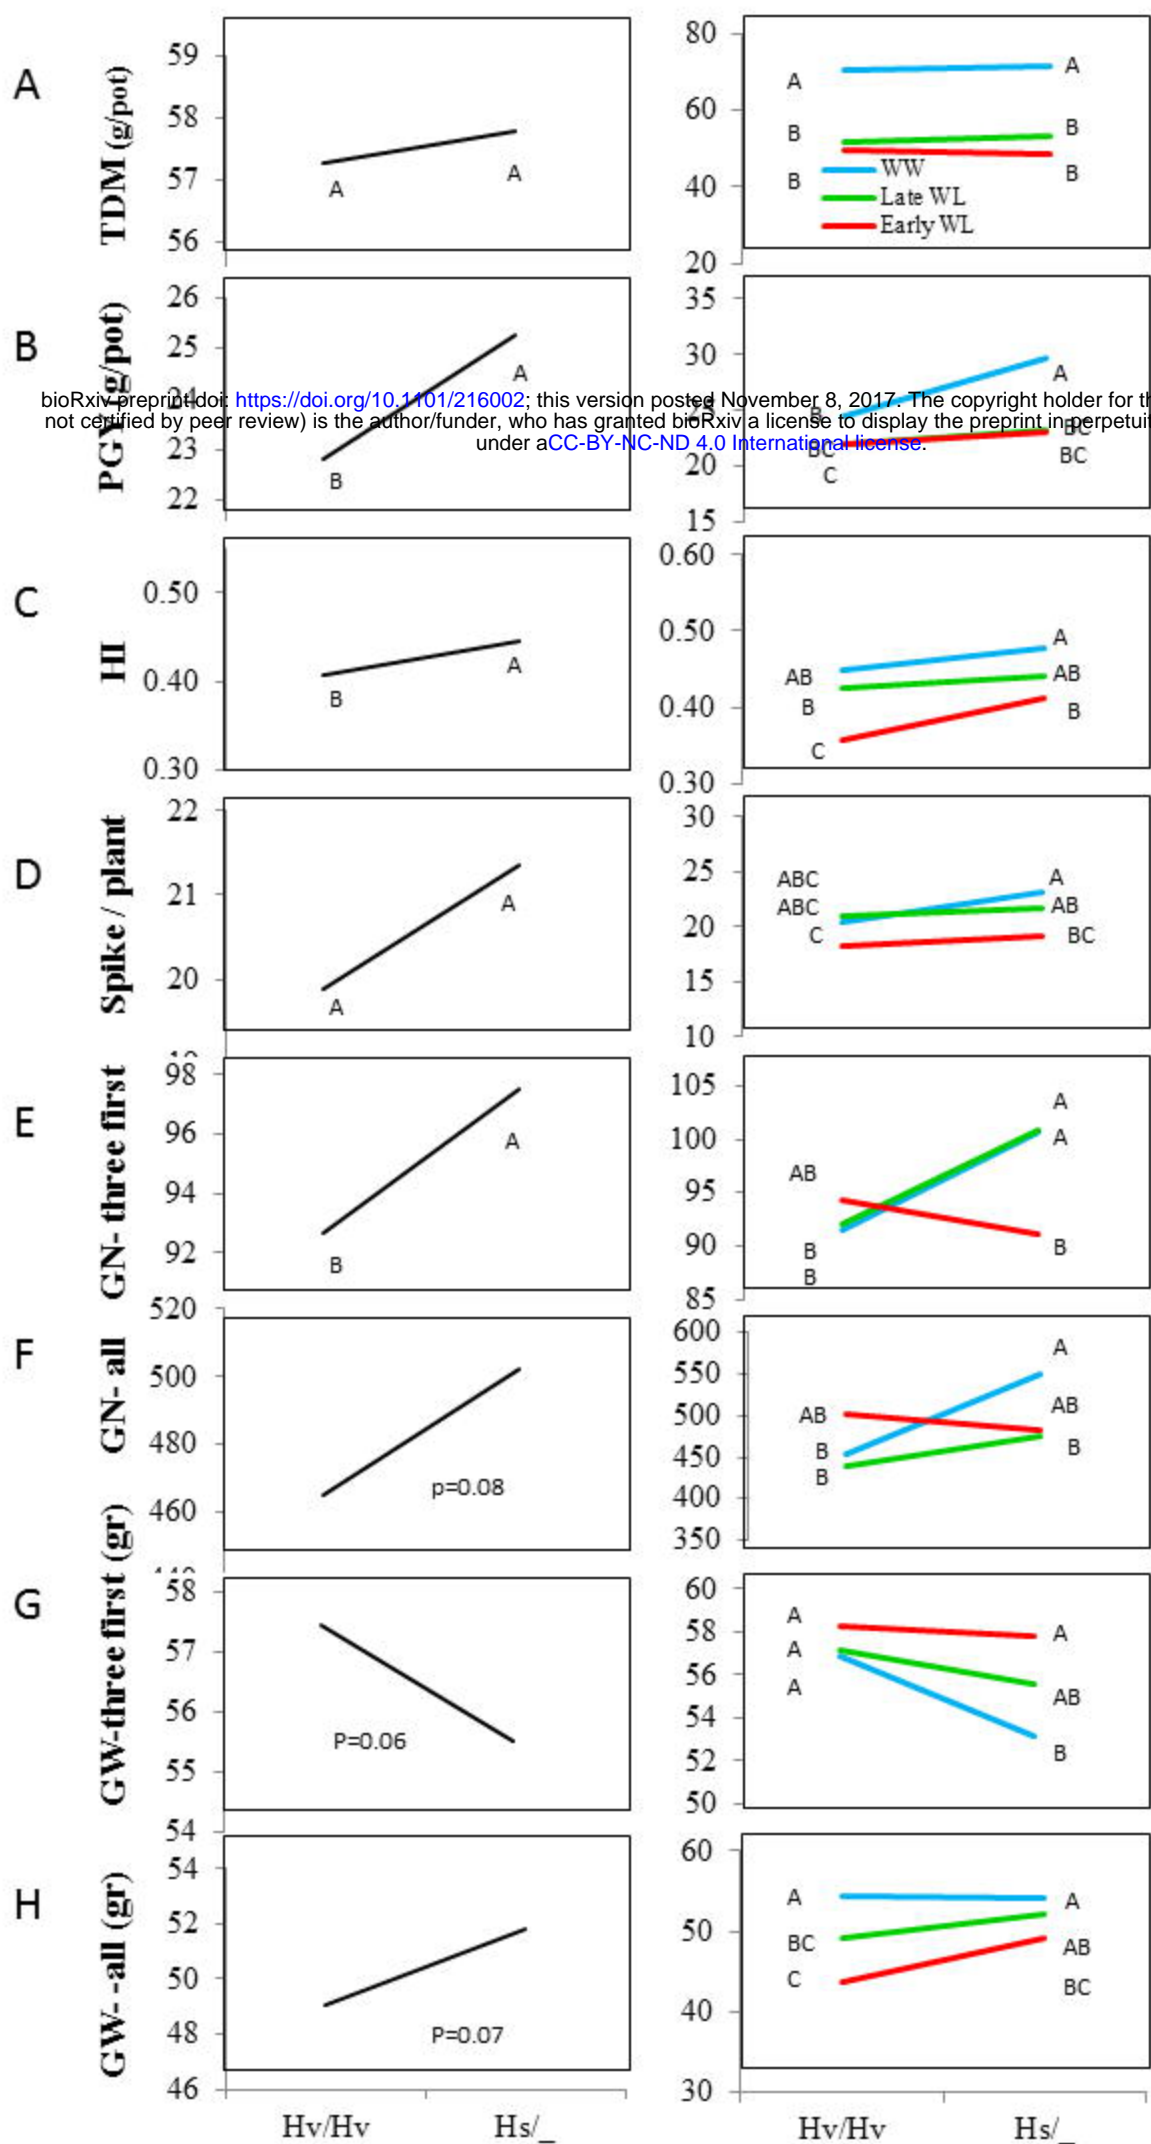

bioRxiv preprint doi: <https://doi.org/10.1101/216002>; this version posted November 8, 2017. The copyright holder for this preprint (which was not certified by peer review) is the author/funder, who has granted bioRxiv a license to display the preprint in perpetuity. It is made available under aCC-BY-NC-ND 4.0 International license.

Different letters represent significance level of  $p < 0.05$  in a students t-test.

Figure 7

bioRxiv preprint doi: <https://doi.org/10.1101/216002>; this version posted November 8, 2017. The copyright holder for this preprint (which was not certified by peer review) is the author/funder, who has granted bioRxiv a license to display the preprint in perpetuity. It is made available under aCC-BY-NC-ND 4.0 International license.

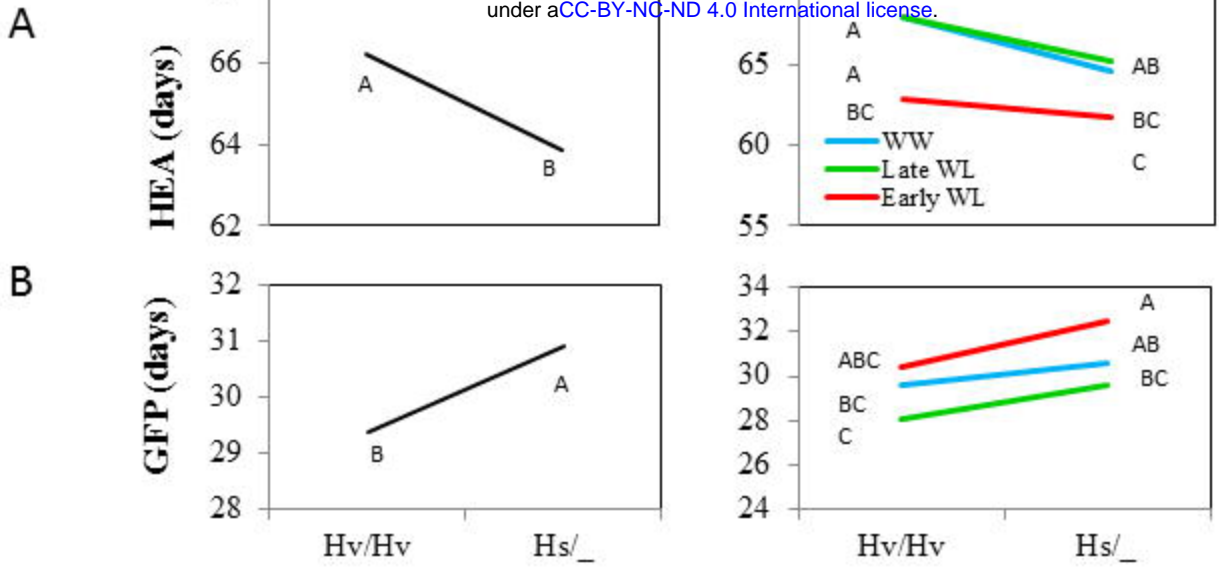

Different letters represent significance level of  $p < 0.05$  in a student's t-test

**Figure 8**

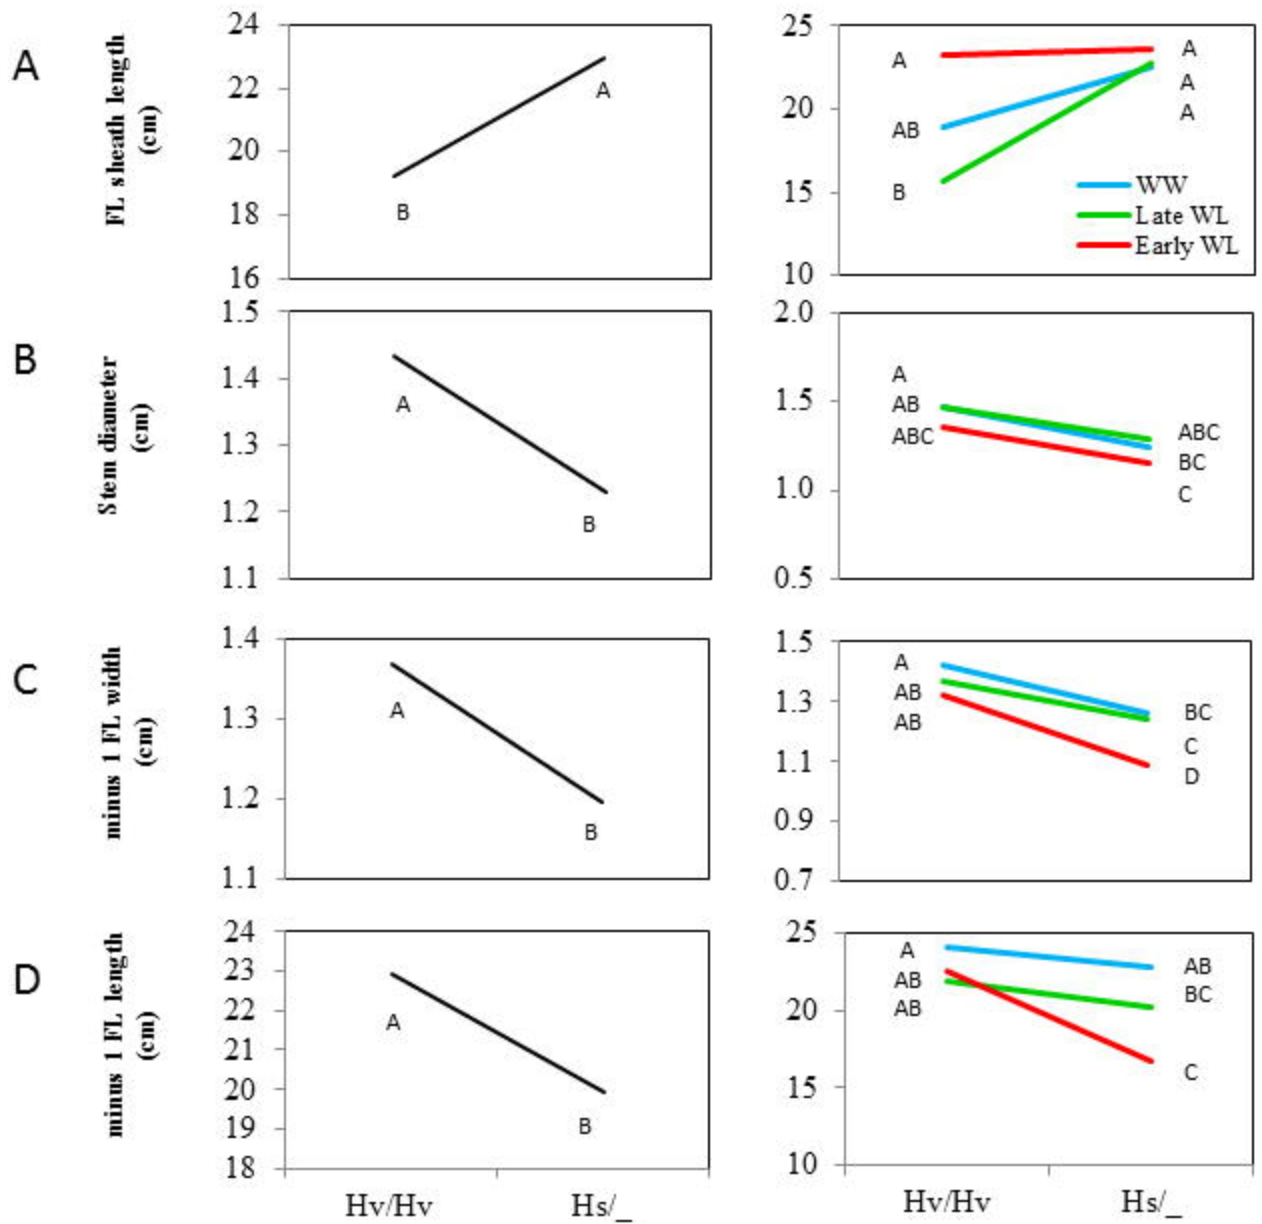

Different letters represent significance level of  $p < 0.05$  in a student's t-test.

Figure 9

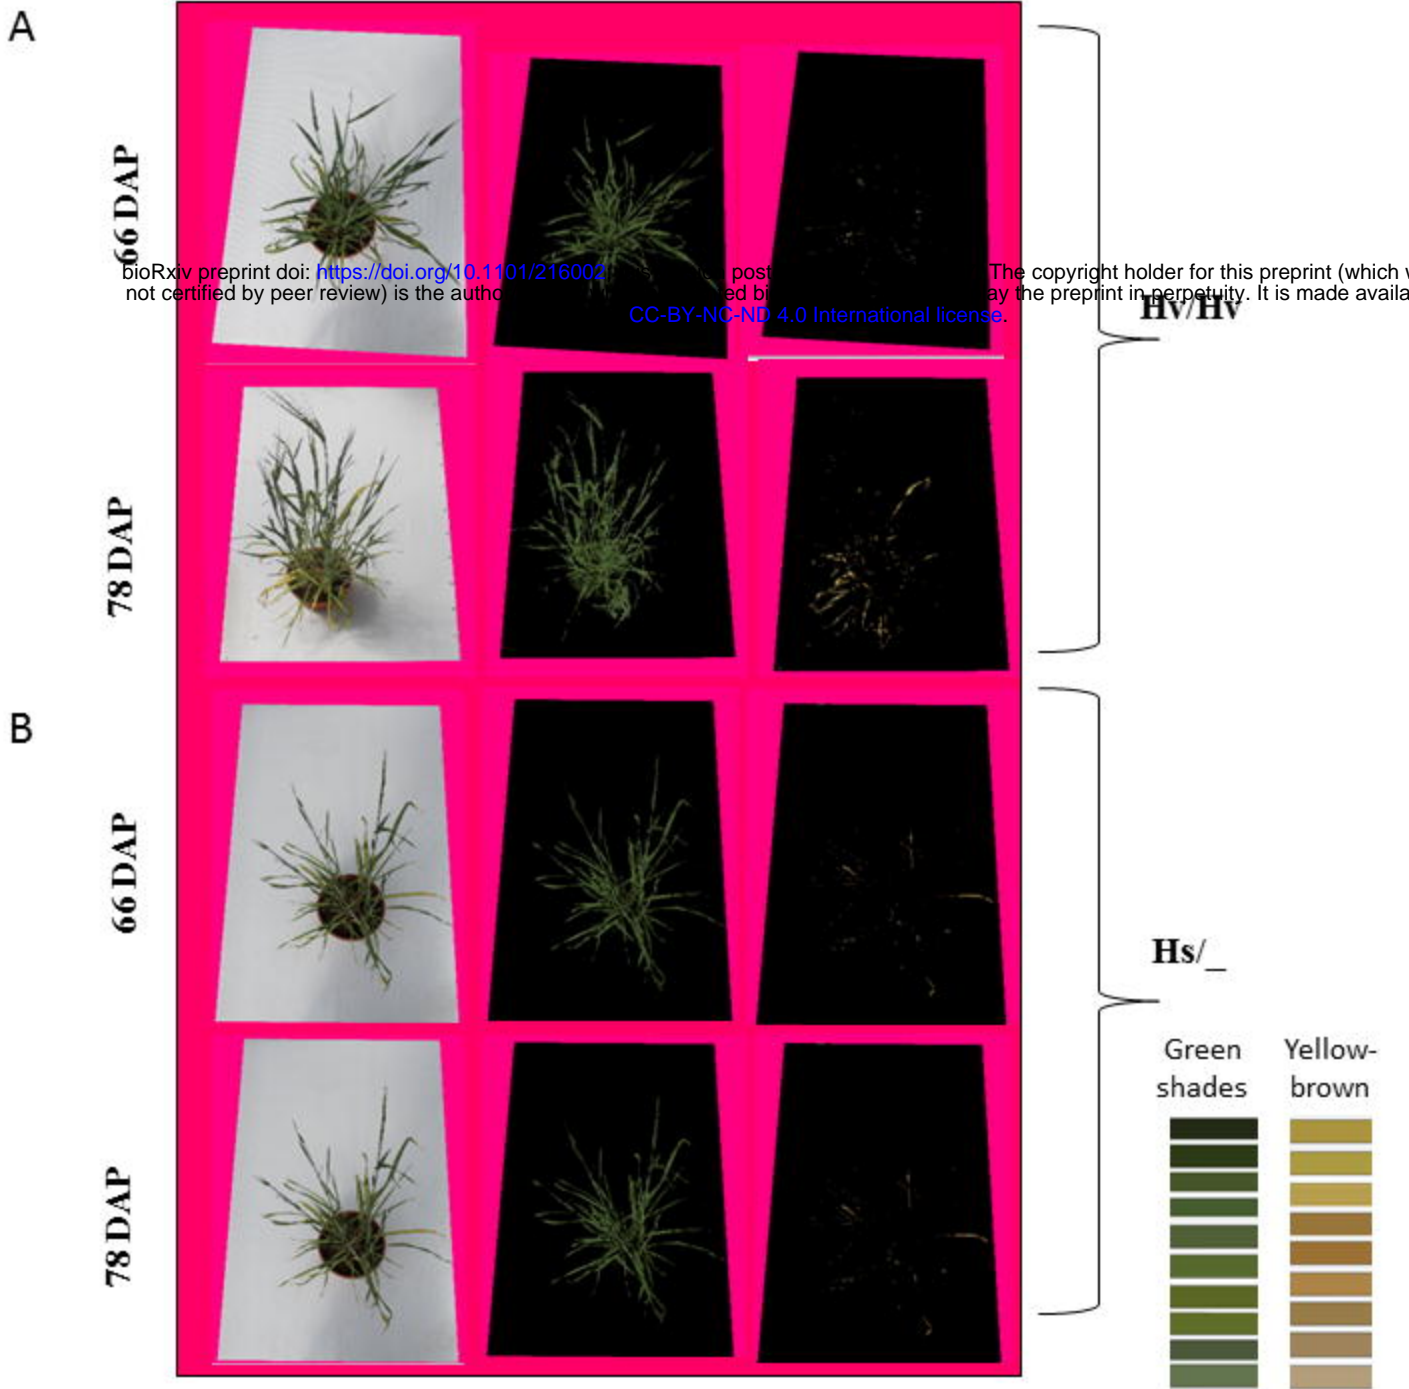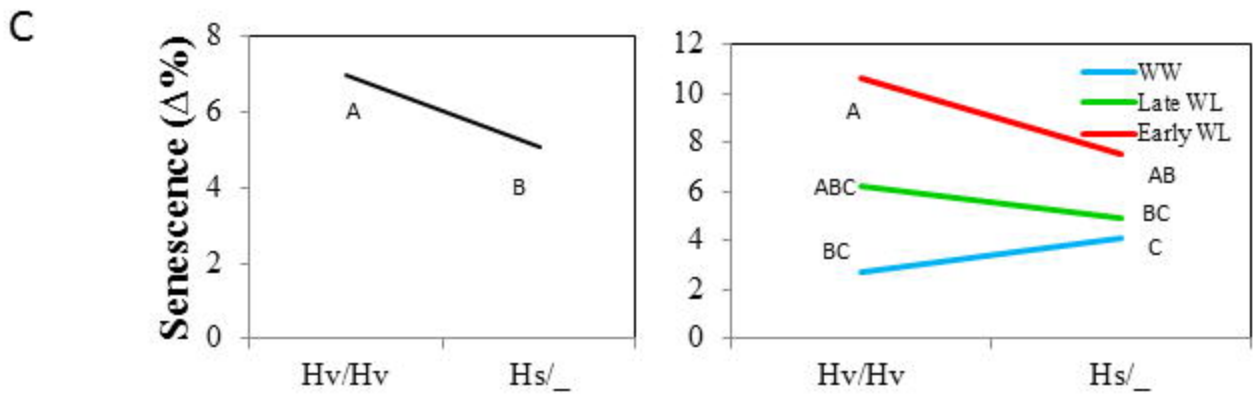

Different letters represent significance level of  $p < 0.05$  in a student's t-test
